# Supplementary material for: Clinical utility of genetic testing in 201 preschool children with inherited eye disorders
Source: PubMed Central journal article supplement (PMC7118019; doi:10.1038/s41436-019-0722-8), 2019-12-18
Supplement: 41436_2019_722_MOESM1_ESM.pdf [file 41436_2019_722_MOESM1_ESM.pdf]

## Supplementary Information

### Clinical utility of genetic testing in 201 pre-school children with inherited eye disorders

Eva Lenassi, PhD, FEBO<sup>1,2</sup>; Jill Clayton-Smith, MD, FRCP<sup>1,2</sup>; Sofia Douzgou, PhD, FRCP<sup>1,2</sup>; Simon C. Ramsden, PhD, FRCPath<sup>1,2</sup>; Stuart Ingram, MSc<sup>2</sup>; Georgina Hall, MSc<sup>1,2</sup>; Claire L. Hardcastle, BSc<sup>2</sup>; Tracy A. Fletcher, BSc<sup>2</sup>; Rachel L. Taylor, PhD<sup>1,2</sup>; Jamie M. Ellingford, PhD<sup>1,2</sup>; William D. Newman, FRCOphth<sup>3</sup>; Cecilia Fenerty, FRCOphth<sup>1,2</sup>; Vinod Sharma, FRCOphth<sup>3</sup>; I. Chris Lloyd, FRCOphth<sup>1,4</sup>; Susmito Biswas, FRCOphth<sup>1,3</sup>; Jane L. Ashworth, PhD, FRCOphth<sup>1,3</sup>; Graeme C. Black, DPhil, FRCOphth<sup>1,2</sup>; Panagiotis I. Sergouniotis, PhD, FRCOphth<sup>1,2,3</sup>

<sup>1</sup> Division of Evolution and Genomic Sciences, School of Biological Sciences, Faculty of Biology, Medicines and Health, University of Manchester, Manchester, UK.

<sup>2</sup> Manchester Centre for Genomic Medicine, Saint Mary's Hospital, Manchester University NHS Foundation Trust, Manchester, UK.

<sup>3</sup> Manchester Royal Eye Hospital, Manchester University NHS Foundation Trust, Manchester, UK.

<sup>4</sup> Great Ormond Street Hospital for Children NHS Foundation Trust, London, UK

**Supplementary Table 1: Clinical and genetic characteristics of the 201 pre-school children included in this study.**

| labno           | gender | age at referral for genetic testing in years | referral diagnosis         | relevant family history | number of genes tested | genotype                                                                                                       | ACMG variant classification ^                                     | avoiding unnecessary tests | initiating surveillance for extraocular manifestations | reducing prognostic uncertainty | determining eligibility for treatment trials | other / comment                                         | case previously reported by our group |
|-----------------|--------|----------------------------------------------|----------------------------|-------------------------|------------------------|----------------------------------------------------------------------------------------------------------------|-------------------------------------------------------------------|----------------------------|--------------------------------------------------------|---------------------------------|----------------------------------------------|---------------------------------------------------------|---------------------------------------|
| albinism (n=32) |        |                                              |                            |                         |                        |                                                                                                                |                                                                   |                            |                                                        |                                 |                                              |                                                         |                                       |
| 17001518        | male   | <1                                           | albinism (oculocutaneous)  | no                      | 18                     | TYR c.1118C>A p.(Thr373Lys) het;<br>TYR c.1217C>T p.(Pro406Leu) het                                            | class 5 (pathogenic);<br>class 5 (pathogenic)                     |                            |                                                        |                                 |                                              |                                                         |                                       |
| 17028077        | male   | 1                                            | albinism (oculocutaneous)  | no                      | 18                     | TYR c.938C>G p.(Pro313Arg) hom                                                                                 | class 4 (likely pathogenic)                                       |                            |                                                        |                                 |                                              | family interested in pre-implantation genetic diagnosis |                                       |
| 17022857        | female | <1                                           | albinism (oculocutaneous)  | yes                     | 18                     | TYR c.823G>T p.(Val275Phe) het;<br>TYR c.1264C>T p.(Arg422Trp) het                                             | class 4 (likely pathogenic);<br>class 4 (likely pathogenic)       |                            |                                                        |                                 |                                              |                                                         |                                       |
| 16000955        | female | 3                                            | albinism (oculocutaneous)  | no                      | 18                     | TYR c.1146C>A p.(Asn382Lys) het;<br>TYR c.1217C>T p.(Pro406Leu) het                                            | class 4 (likely pathogenic);<br>class 5 (pathogenic)              |                            |                                                        |                                 |                                              |                                                         |                                       |
| 18004390        | male   | <1                                           | albinism (oculocutaneous)  | no                      | 18                     | TYR c.1146C>A p.(Asn382Lys) het;<br>TYR c.1336G>A p.(Gly446Ser) het                                            | class 4 (likely pathogenic);<br>class 4 (likely pathogenic)       |                            |                                                        |                                 |                                              | familial concerns about Hermansky-Pudlak syndrome       |                                       |
| 16009407        | male   | 3                                            | albinism (oculocutaneous)  | no                      | 18                     | TYR c.107G>A p.(Cys36Tyr) het;<br>TYR c.613C>A p.(Pro205Thr) het                                               | class 3 (VOUS);<br>class 3 (VOUS)                                 |                            |                                                        |                                 |                                              | familial concerns about Hermansky-Pudlak syndrome       |                                       |
| 16010606        | female | <1                                           | albinism (oculocutaneous)  | no                      | 18                     | TYR c.1099C>T p.(His367Tyr) het;<br>TYR c.1118C>A p.(Thr373Lys) het                                            | class 4 (likely pathogenic);<br>class 5 (pathogenic)              |                            |                                                        |                                 |                                              |                                                         |                                       |
| 17003996        | female | 3                                            | albinism (oculocutaneous)  | no                      | 18                     | TYR c.229C>T p.(Arg77Trp) het;<br>TYR c.1204C>T p.(Arg402Ter) het                                              | class 4 (likely pathogenic);<br>class 5 (pathogenic)              |                            |                                                        |                                 |                                              | familial concerns about Hermansky-Pudlak syndrome       |                                       |
| 17001519        | male   | 4                                            | albinism (oculocutaneous); | no                      | 18                     | TYR c.1114G>A p.(Gly372Arg) hom                                                                                | class 4 (likely pathogenic)                                       |                            |                                                        |                                 |                                              |                                                         |                                       |
| 16026544        | female | <1                                           | albinism (oculocutaneous)  | no                      | 18                     | TYR c.1118C>A p.(Thr373Lys) het;<br>TYR c.575C>A p.(Ser192Tyr) hom;<br>TYR c.1205G>A p.(Arg402Gln) het         | class 5 (pathogenic);<br>class 3 (VOUS);<br>class 3 (VOUS)        |                            |                                                        |                                 |                                              |                                                         |                                       |
| 17012896        | female | 1                                            | albinism (oculocutaneous)  | no                      | 18                     | TYR c.242C>T p.(Pro81Leu) het;<br>TYR c.575C>A p.(Ser192Tyr) hom;<br>TYR c.1205G>A p.(Arg402Gln) het           | class 3 (VOUS);<br>class 3 (VOUS);<br>class 3 (VOUS)              |                            |                                                        |                                 |                                              |                                                         |                                       |
| 17029046        | male   | 1                                            | albinism (oculocutaneous)  | no                      | 18                     | TYR c.1099C>T p.(His367Tyr) het;<br>TYR c.575C>A p.(Ser192Tyr) hom;<br>TYR c.1205G>A p.(Arg402Gln) het         | class 4 (likely pathogenic);<br>class 3 (VOUS);<br>class 3 (VOUS) |                            |                                                        |                                 |                                              |                                                         |                                       |
| 16002468        | male   | 4                                            | albinism (oculocutaneous)  | affected sister         | 18                     | TYR c.1467dupT p.(Ala490CysfsTer20) het;<br>TYR c.575C>A p.(Ser192Tyr) het;<br>TYR c.1205G>A p.(Arg402Gln) het | class 4 (likely pathogenic);<br>class 3 (VOUS);<br>class 3 (VOUS) |                            |                                                        |                                 |                                              | familial concerns about Hermansky-Pudlak syndrome       |                                       |
| 18017244        | male   | 1                                            | albinism (oculocutaneous)  | no                      | 18                     | TYR c.61C>T p.(Pro21Ser) het;<br>TYR c.575C>A p.(Ser192Tyr) het;<br>TYR c.1205G>A p.(Arg402Gln) het            | class 4 (likely pathogenic);<br>class 3 (VOUS);<br>class 3 (VOUS) |                            |                                                        |                                 |                                              |                                                         |                                       |
| 17007832        | female | 4                                            | albinism (oculocutaneous)  | no                      | 18                     | TYR c.1204C>T p.(Arg402Ter) het;<br>TYR c.575C>A p.(Ser192Tyr) het;<br>TYR c.1205G>A p.(Arg402Gln) het         | class 5 (pathogenic);<br>class 3 (VOUS);<br>class 3 (VOUS)        |                            |                                                        |                                 |                                              |                                                         |                                       |
| 18006521        | female | 3                                            | albinism (oculocutaneous)  | no                      | 18                     | TYRP1 c.1103delA p.(Lys368SerfsTer17) het;<br>TYRP1 ex1 to ex5 three copies                                    | class 4 (likely pathogenic);<br>class 4 (likely pathogenic)       |                            |                                                        |                                 |                                              |                                                         |                                       |
| 16010468        | female | 1                                            | albinism (oculocutaneous)  | no                      | 18                     | TYRP1 c.725_728dupCTTC p.(Ser245PhefsTer16) het;<br>TYRP1 c.395A>T p.(Asn132Ile) het                           | class 5 (pathogenic);<br>class 3 (VOUS)                           |                            |                                                        |                                 |                                              |                                                         |                                       |

| labno    | gender | age at referral for genetic testing in years | referral diagnosis                                                             | relevant family history  | number of genes tested | genotype                                                                                               | ACMG variant classification                                | avoiding unnecessary tests | initiating surveillance for extraocular manifestations | reducing prognostic uncertainty | determining eligibility for treatment trials | other / comment                                   | case previously reported by our group |
|----------|--------|----------------------------------------------|--------------------------------------------------------------------------------|--------------------------|------------------------|--------------------------------------------------------------------------------------------------------|------------------------------------------------------------|----------------------------|--------------------------------------------------------|---------------------------------|----------------------------------------------|---------------------------------------------------|---------------------------------------|
| 16014555 | male   | 2                                            | albinism (oculocutaneous)                                                      | no                       | 18                     | OCA2 c.2020C>G p.(Leu674Val) hom                                                                       | class 3 (VOUS)                                             |                            |                                                        |                                 |                                              |                                                   |                                       |
| 16021414 | male   | 4                                            | albinism (oculocutaneous)                                                      | affected sister          | 18                     | OCA2 c.1327G>A p.(Val443Ile) hom                                                                       | class 4 (likely pathogenic)                                |                            |                                                        |                                 |                                              |                                                   |                                       |
| 16023117 | male   | <1                                           | albinism (oculocutaneous)                                                      | no                       | 18                     | OCA2 exon 7 deletion hom                                                                               | class 5 (pathogenic)                                       |                            |                                                        |                                 |                                              |                                                   |                                       |
| 17018603 | male   | 4                                            | albinism (oculocutaneous)                                                      | younger brother affected | 18                     | OCA2 exon 7 deletion hom                                                                               | class 5 (pathogenic)                                       |                            |                                                        |                                 |                                              | familial concerns about Hermansky-Pudlak syndrome |                                       |
| 17017561 | male   | <1                                           | albinism (oculocutaneous)                                                      | no                       | 18                     | OCA2 c.1664G>C p.(Arg555Pro) het;<br>OCA2 c.1841dupA p.(His615AlafsTer2) het                           | class 3 (VOUS);<br>class 5 (pathogenic)                    |                            |                                                        |                                 |                                              |                                                   |                                       |
| 18004387 | female | <1                                           | albinism (oculocutaneous)                                                      | no                       | 18                     | OCA2 c.1951+1G>A het;<br>OCA2 c.2330G>A p.(Cys777Tyr) het                                              | class 5 (pathogenic);<br>class 3 (VOUS)                    |                            |                                                        |                                 |                                              |                                                   |                                       |
| 18004262 | female | <1                                           | albinism (oculocutaneous)                                                      | no                       | 18                     | OCA2 c.2051_2052delinsG p.(Phe684CysfsTer8) het                                                        | class 5 (pathogenic)                                       |                            |                                                        |                                 |                                              | familial concerns about Hermansky-Pudlak syndrome |                                       |
| 18012132 | female | <1                                           | albinism (oculocutaneous)                                                      | no                       | 26                     | OCA2 c.1327G>A p.(Val443Ile) het<br>OCA2 exons 19 to 21 duplication het                                | class 4 (likely pathogenic);<br>class 3 (VOUS)             |                            |                                                        |                                 |                                              |                                                   |                                       |
| 17028507 | male   | <1                                           | albinism (oculocutaneous)                                                      | no                       | 18                     | HPS5 c.1507G>T p.(Glu503Ter) hom                                                                       | class 5 (pathogenic)                                       |                            | haematology referral initiated                         |                                 |                                              |                                                   |                                       |
| 16010469 | male   | 1                                            | albinism (oculocutaneous)                                                      | no                       | 18                     | no clearly causative variant identified                                                                | not applicable                                             |                            |                                                        |                                 |                                              | phenotype unlike classical albinism               |                                       |
| 17013894 | male   | <1                                           | albinism (ocular or oculocutaneous)                                            | no                       | 18                     | GPR143 c.659-1G>A hemi                                                                                 | class 5 (pathogenic)                                       |                            |                                                        |                                 |                                              | tailored advice on skin photoprotection           | yes [PMID:31719542]                   |
| 16017162 | male   | 1                                            | albinism (ocular or oculocutaneous)                                            | yes                      | 40                     | TYR c.1118C>A p.(Thr373Lys) het;<br>TYR c.1205G>A p.(Arg402Gln) het;<br>TYR c.575C>A p.(Ser192Tyr) hom | class 5 (pathogenic);<br>class 3 (VOUS);<br>class 3 (VOUS) |                            |                                                        |                                 |                                              | tailored advice on skin photoprotection           | yes [PMID:31719542]                   |
| 17011637 | male   | 1                                            | albinism (ocular or oculocutaneous)                                            | no                       | 18                     | TYR c.1217C>T p.(Pro406Leu) het;<br>TYR c.1205G>A p.(Arg402Gln) het;<br>TYR c.575C>A p.(Ser192Tyr) het | class 5 (pathogenic);<br>class 3 (VOUS);<br>class 3 (VOUS) |                            |                                                        |                                 |                                              | tailored advice on skin photoprotection           | yes [PMID:31719542]                   |
| 16006232 | male   | <1                                           | albinism (oculocutaneous);<br>developmental delay;<br>epileptic encephalopathy | yes                      | 18                     | TYR c.38delT p.(Phe13SerfsTer18) hom                                                                   | class 5 (pathogenic)                                       |                            |                                                        |                                 |                                              |                                                   |                                       |
| 17022050 | male   | 5                                            | albinism (ocular);<br>developmental delay;<br>microcephaly                     | no                       | 18                     | no clearly causative variant identified                                                                | not applicable                                             |                            |                                                        |                                 |                                              |                                                   | yes [PMID:31719542]                   |

↓

| labno                                | gender | age at referral for genetic testing in years | referral diagnosis                   | relevant family history | number of genes tested | genotype                                          | ACMG variant classification | avoiding unnecessary tests             | initiating surveillance for extraocular manifestations | reducing prognostic uncertainty | determining eligibility for treatment trials | other / comment | case previously reported by our group |
|--------------------------------------|--------|----------------------------------------------|--------------------------------------|-------------------------|------------------------|---------------------------------------------------|-----------------------------|----------------------------------------|--------------------------------------------------------|---------------------------------|----------------------------------------------|-----------------|---------------------------------------|
| bilateral paediatric cataract (n=74) |        |                                              |                                      |                         |                        |                                                   |                             |                                        |                                                        |                                 |                                              |                 |                                       |
| 17026278                             | male   | <1                                           | congenital cataracts                 | yes                     | 144                    | CRYAA c.61C>T p.(Arg21Trp) het                    | class 4 (likely pathogenic) | no further diagnostic work-up required |                                                        |                                 |                                              |                 |                                       |
| 17021643                             | male   | <1                                           | congenital cataracts; microphthalmia | no                      | 144                    | CRYAA c.34C>T p.(Arg12Cys) het                    | class 4 (likely pathogenic) | no further diagnostic work-up required |                                                        |                                 |                                              |                 |                                       |
| 15007971                             | female | <1                                           | congenital cataracts                 | yes                     | 114                    | CRYAA c.62G>T p.(Arg21Leu) het                    | class 4 (likely pathogenic) | no further diagnostic work-up required |                                                        |                                 |                                              |                 |                                       |
| 15021428                             | male   | <1                                           | congenital cataracts                 | yes                     | 114                    | CRYAA c.61C>T p.(Arg21Trp) het                    | class 4 (likely pathogenic) | no further diagnostic work-up required |                                                        |                                 |                                              |                 |                                       |
| 14017471                             | female | 1                                            | congenital cataracts                 | no                      | 114                    | CRYBA1 c.475G>A p.(Gly159Ser) het                 | class 4 (likely pathogenic) | no further diagnostic work-up required |                                                        |                                 |                                              |                 |                                       |
| 15016254                             | female | 5                                            | congenital cataracts                 | no                      | 114                    | CRYBA1 c.215+2T>C het                             | class 3 (VOUS)              | no further diagnostic work-up required |                                                        |                                 |                                              |                 |                                       |
| 16026011                             | male   | 1                                            | congenital cataracts                 | yes                     | 144                    | CRYBA1 c.215+2T>A het                             | class 4 (likely pathogenic) | no further diagnostic work-up required |                                                        |                                 |                                              |                 |                                       |
| 17030224                             | female | <1                                           | congenital cataracts; trisomy 21     | no                      | 144                    | CRYBB1 c.473dupA p.(Asn158LysfsTer24) het         | class 3 (VOUS)              | no further diagnostic work-up required |                                                        |                                 |                                              |                 |                                       |
| 15010948                             | female | <1                                           | congenital cataracts                 | no                      | 114                    | CRYGD c.127T>C p.(Trp43Arg) het                   | class 4 (likely pathogenic) | no further diagnostic work-up required |                                                        |                                 |                                              |                 |                                       |
| 15004858                             | female | 4                                            | congenital cataracts                 | no                      | 114                    | CRYAB c.295G>T p.(Glu69Ter) het                   | class 4 (likely pathogenic) | no further diagnostic work-up required | cardiology referral initiated                          |                                 |                                              |                 |                                       |
| 15019910                             | female | 5                                            | congenital cataracts                 | yes                     | 114                    | GJA3 c.148T>C p.(Ser50Pro) het                    | class 4 (likely pathogenic) | no further diagnostic work-up required |                                                        |                                 |                                              |                 | yes [PMID: 25148791]                  |
| 17008393                             | male   | 3                                            | congenital cataracts                 | yes                     | 144                    | GJA3 c.148T>C p.(Ser50Pro) het                    | class 4 (likely pathogenic) | no further diagnostic work-up required |                                                        |                                 |                                              |                 |                                       |
| 15018151                             | female | <1                                           | congenital cataracts                 | no                      | 114                    | GJA8 c.263C>T p.(Pro88Leu) het                    | class 3 (VOUS)              | no further diagnostic work-up required |                                                        |                                 |                                              |                 |                                       |
| 11012212                             | female | <1                                           | congenital cataract                  | yes                     | 144                    | GJA8 c.293A>G p.(His98Arg) het                    | class 3 (VOUS)              | no further diagnostic work-up required |                                                        |                                 |                                              |                 | yes [PMID: 25148791]                  |
| 18009736                             | male   | 2                                            | congenital cataracts                 | yes                     | 144                    | BFSP2 c.697_699del p.(Glu233del) het              | class 4 (likely pathogenic) | no further diagnostic work-up required |                                                        |                                 |                                              |                 | yes [PMID: 25148791]                  |
| 14011092                             | female | <1                                           | congenital cataracts                 | no                      | 114                    | chromosome deletion involving whole BCOR gene het | class 3 (VOUS)              | no further diagnostic work-up required | cardiology referral initiated                          |                                 |                                              |                 |                                       |
| 15014851                             | female | <1                                           | congenital cataracts                 | no                      | 114                    | HSF4 c.479T>G p.(Leu160Arg) hom                   | class 3 (VOUS)              | no further diagnostic work-up required |                                                        |                                 |                                              |                 |                                       |

| labno    | gender | age at referral for genetic testing in years | referral diagnosis                                                            | relevant family history | number of genes tested | genotype                                                                               | ACMG variant classification                                 | avoiding unnecessary tests             | initiating surveillance for extraocular manifestations      | reducing prognostic uncertainty | determining eligibility for treatment trials | other / comment                                         | case previously reported by our group |
|----------|--------|----------------------------------------------|-------------------------------------------------------------------------------|-------------------------|------------------------|----------------------------------------------------------------------------------------|-------------------------------------------------------------|----------------------------------------|-------------------------------------------------------------|---------------------------------|----------------------------------------------|---------------------------------------------------------|---------------------------------------|
| 17003685 | female | <1                                           | congenital cataracts                                                          | no                      | 144                    | HSF4 c.503G>A p.(Trp168Ter) het;<br>HSF4 c.1188+1G>A het                               | class 5 (pathogenic);<br>class 5 (pathogenic)               | no further diagnostic work-up required |                                                             |                                 |                                              |                                                         |                                       |
| 18010355 | male   | <1                                           | congenital cataracts                                                          | no                      | 144                    | FYCO1 c.2443delA p.(Met815TrpfsTer6) het;<br>FYCO1 c.1237delG p.(Glu413ArgfsTer25) het | class 5 (pathogenic);<br>class 5 (pathogenic)               | no further diagnostic work-up required |                                                             |                                 |                                              |                                                         |                                       |
| 15016572 | female | <1                                           | congenital cataracts                                                          | no                      | 114                    | FYCO1 c.539+3A>G het;<br>FYCO1 c.395+2T>G het                                          | class 4 (likely pathogenic);<br>class 4 (likely pathogenic) | no further diagnostic work-up required |                                                             |                                 |                                              |                                                         |                                       |
| 15021966 | male   | <1                                           | congenital cataracts                                                          | yes                     | 114                    | PITX3 c.640_656del p.(Ala214ArgfsTer42) het                                            | class 5 (pathogenic)                                        | no further diagnostic work-up required |                                                             |                                 |                                              |                                                         |                                       |
| 17015905 | male   | 5                                            | congenital cataracts                                                          | yes                     | 144                    | PITX3 c.640_656dup p.(Gly220ProfsTer95) het                                            | class 5 (pathogenic)                                        | no further diagnostic work-up required |                                                             |                                 |                                              |                                                         |                                       |
| 16017070 | male   | <1                                           | congenital cataracts                                                          | no                      | 114                    | FOXE3 c.352A>G p.(Ser118Gly) hom                                                       | class 3 (VOUS)                                              | no further diagnostic work-up required |                                                             |                                 |                                              |                                                         |                                       |
| 16001640 | male   | 2                                            | congenital cataracts                                                          | no                      | 114                    | MIP c.559C>T p.(Arg187Cys) het;<br>CRYAA c.410G>C p.(Gly137Ala) het                    | class 4 (likely pathogenic);<br>class 3 (VOUS)              | no further diagnostic work-up required |                                                             |                                 |                                              |                                                         |                                       |
| 17004217 | male   | <1                                           | congenital cataracts;<br>trisomy 21                                           | no                      | 144                    | VIM c.1080C>G p.(Asp360Glu) het                                                        | class 3 (VOUS)                                              | no further diagnostic work-up required |                                                             |                                 |                                              |                                                         |                                       |
| 15000185 | male   | <1                                           | congenital cataracts;<br>trisomy 21                                           | no                      | 114                    | FOXE3 c.431A>G, p.(Tyr144Cys) het                                                      | class 3 (VOUS)                                              | no further diagnostic work-up required |                                                             |                                 |                                              |                                                         |                                       |
| 16022871 | male   | 5                                            | congenital cataracts                                                          | no                      | 144                    | LONP1 c.1661A>T p.(Asp554Val) hom                                                      | class 3 (VOUS)                                              | no further diagnostic work-up required |                                                             |                                 |                                              |                                                         |                                       |
| 14022259 | male   | <1                                           | congenital cataracts                                                          | no                      | 114                    | NHS c.3127C>T p.(Gln1043Ter) hemi<br>[de novo]                                         | class 5 (pathogenic)                                        | no further diagnostic work-up required | dental referral initiated;<br>development closely monitored |                                 |                                              |                                                         |                                       |
| 17014480 | female | <1                                           | congenital cataracts;<br>microphthalmia                                       | yes                     | 144                    | RAB3GAP1 c.1417_1423del p.(Gly473LysfsTer23) hom                                       | class 5 (pathogenic)                                        | no further diagnostic work-up required | development closely monitored                               |                                 |                                              | family interested in pre-implantation genetic diagnosis |                                       |
| 16024006 | male   | <1                                           | congenital cataracts;<br>microphthalmia                                       | no                      | 144                    | COL4A1 c.2317G>A p.(Gly773Arg) het                                                     | class 4 (likely pathogenic)                                 | no further diagnostic work-up required | cardiology referral & renal screening initiated             |                                 |                                              |                                                         |                                       |
| 18014933 | female | <1                                           | congenital cataracts                                                          | no                      | 144                    | COL4A1 c.2317G>A p.(Gly773Arg) het<br>[de novo]                                        | class 4 (likely pathogenic)                                 | no further diagnostic work-up required | cardiology referral & renal screening initiated             |                                 |                                              | result informed reproductive planning                   |                                       |
| 14001458 | male   | <1                                           | congenital cataracts; cerebral infarction                                     | no                      | 114                    | COL4A1 c.2273G>A p.(Gly758Glu) het<br>[de novo]                                        | class 4 (likely pathogenic)                                 | no further diagnostic work-up required | renal screening initiated                                   |                                 |                                              | result informed reproductive planning                   |                                       |
| 15000884 | male   | 3                                            | congenital cataracts;<br>developmental delay; neonatal porocephalic cyst      | no                      | 114                    | COL4A1 c.2662G>C p.(Gly888Arg) het<br>[de novo]                                        | class 4 (likely pathogenic)                                 | no further diagnostic work-up required | renal screening initiated                                   |                                 |                                              | result informed reproductive planning                   |                                       |
| 14022248 | male   | 2                                            | congenital cataracts;<br>developmental delay; cerebellar atrophy              | no                      | genome sequencing      | SIL1 exon 3 to 4 deletion hom                                                          | class 5 (pathogenic)                                        | no further diagnostic work-up required |                                                             |                                 |                                              |                                                         |                                       |
| 14013821 | female | <1                                           | congenital cataracts;<br>microphthalmia; microcephaly;<br>developmental delay | no                      | genome sequencing      | CTNBN1 c.884C>G p.(Ala295Gly) hom                                                      | class 3 (VOUS)                                              | no further diagnostic work-up required |                                                             |                                 |                                              |                                                         |                                       |

| labno    | gender | age at referral for genetic testing in years | referral diagnosis                                                                         | relevant family history | number of genes tested | genotype                                                                                    | ACMG variant classification                | avoiding unnecessary tests             | initiating surveillance for extraocular manifestations | reducing prognostic uncertainty | determining eligibility for treatment trials | other / comment                       | case previously reported by our group |
|----------|--------|----------------------------------------------|--------------------------------------------------------------------------------------------|-------------------------|------------------------|---------------------------------------------------------------------------------------------|--------------------------------------------|----------------------------------------|--------------------------------------------------------|---------------------------------|----------------------------------------------|---------------------------------------|---------------------------------------|
| 13006157 | female | <1                                           | congenital cataracts; developmental delay; congenital hypothyroidism; subependymal nodules | no                      | genome sequencing      | NALCN c.1186G>A p.(Val396Met) het [de novo]                                                 | class 3 (VOUS)                             | no further diagnostic work-up required |                                                        |                                 |                                              | result informed reproductive planning |                                       |
| 18018483 | female | 2                                            | congenital cataract; developmental delay; lumbar spine skin dimple                         | no                      | 144                    | GALK1 c.998T>C p.(Leu333Pro) hom                                                            | class 3 (VOUS)                             | no further diagnostic work-up required | metabolic work-up initiated                            |                                 |                                              |                                       |                                       |
| 16014046 | male   | <1                                           | congenital cataracts                                                                       | no                      | 114                    | no clearly causative variant identified; CRYAB c.460G>A p.(Gly154Ser) het                   | class 3 (VOUS)                             |                                        |                                                        |                                 |                                              |                                       |                                       |
| 15004571 | female | <1                                           | congenital cataracts                                                                       | no                      | 114                    | no clearly causative variant identified; ADAMTSL4 c.767_768del het; ADAMTSL4 c.2520dupC het | class 5 (pathogenic); class 5 (pathogenic) |                                        |                                                        |                                 |                                              |                                       |                                       |
| 15001368 | female | 5                                            | congenital cataracts                                                                       | yes                     | 114                    | no clearly causative variant identified; COL2A1 c.4148C>T p.(Thr1383Met) het                | class 3 (VOUS)                             |                                        |                                                        |                                 |                                              |                                       |                                       |
| 17013599 | male   | 1                                            | congenital cataracts                                                                       | yes                     | 144                    | no clearly causative variant identified; RAB3GAP2 c.4175_4178del p.(Ser1392TyrfSTer10) het  | class 3 (VOUS)                             |                                        |                                                        |                                 |                                              |                                       |                                       |
| 17001526 | female | 1                                            | congenital cataracts                                                                       | no                      | 144                    | no clearly causative variant identified; CBS c.1105C>T p.(Arg369Cys) het                    | class 4 (likely pathogenic)                |                                        |                                                        |                                 |                                              |                                       |                                       |
| 17001521 | female | 5                                            | congenital cataracts                                                                       | no                      | 144                    | no clearly causative variant identified; ALDH18A1 c.1273C>T p.(Arg425Cys) het               | class 3 (VOUS)                             |                                        |                                                        |                                 |                                              |                                       |                                       |
| 16004017 | male   | 3                                            | congenital cataracts                                                                       | no                      | 114                    | no clearly causative variant identified                                                     | not applicable                             |                                        |                                                        |                                 |                                              |                                       |                                       |
| 16013132 | female | 3                                            | congenital cataracts                                                                       | no                      | 114                    | no clearly causative variant identified                                                     | not applicable                             |                                        |                                                        |                                 |                                              |                                       |                                       |
| 15003590 | male   | 4                                            | congenital cataracts                                                                       | no                      | 114                    | no clearly causative variant identified                                                     | not applicable                             |                                        |                                                        |                                 |                                              |                                       |                                       |
| 18009939 | male   | <1                                           | congenital cataracts                                                                       | no                      | 144                    | no clearly causative variant identified                                                     | not applicable                             |                                        |                                                        |                                 |                                              |                                       |                                       |
| 12009672 | male   | 1                                            | congenital cataracts                                                                       | yes                     | 114                    | no clearly causative variant identified                                                     | not applicable                             |                                        |                                                        |                                 |                                              |                                       |                                       |
| 14005417 | male   | 1                                            | congenital cataracts                                                                       | no                      | 114                    | no clearly causative variant identified                                                     | not applicable                             |                                        |                                                        |                                 |                                              |                                       |                                       |
| 13018264 | male   | 5                                            | congenital cataracts                                                                       | no                      | 114                    | no clearly causative variant identified                                                     | not applicable                             |                                        |                                                        |                                 |                                              |                                       |                                       |
| 14016196 | male   | 5                                            | congenital cataracts                                                                       | no                      | 114                    | no clearly causative variant identified                                                     | not applicable                             |                                        |                                                        |                                 |                                              |                                       |                                       |
| 14018931 | male   | 4                                            | congenital cataracts                                                                       | no                      | 114                    | no clearly causative variant identified                                                     | not applicable                             |                                        |                                                        |                                 |                                              |                                       |                                       |
| 14020759 | female | 5                                            | congenital cataracts                                                                       | no                      | 114                    | no clearly causative variant identified                                                     | not applicable                             |                                        |                                                        |                                 |                                              |                                       |                                       |

| labno    | gender | age at referral for genetic testing in years | referral diagnosis                                                                           | relevant family history | number of genes tested | genotype                                                                                   | ACMG variant classification | avoiding unnecessary tests | initiating surveillance for extraocular manifestations | reducing prognostic uncertainty | determining eligibility for treatment trials | other / comment            | case previously reported by our group |
|----------|--------|----------------------------------------------|----------------------------------------------------------------------------------------------|-------------------------|------------------------|--------------------------------------------------------------------------------------------|-----------------------------|----------------------------|--------------------------------------------------------|---------------------------------|----------------------------------------------|----------------------------|---------------------------------------|
| 16024573 | female | 4                                            | congenital cataracts                                                                         | no                      | 144                    | no clearly causative variant identified                                                    | not applicable              |                            |                                                        |                                 |                                              |                            |                                       |
| 17000928 | female | 5                                            | congenital cataracts                                                                         | no                      | 144                    | no clearly causative variant identified                                                    | not applicable              |                            |                                                        |                                 |                                              |                            |                                       |
| 14017818 | male   | <1                                           | congenital cataracts                                                                         | no                      | 114                    | no clearly causative variant identified                                                    | not applicable              |                            |                                                        |                                 |                                              |                            |                                       |
| 17027784 | male   | 4                                            | congenital cataracts                                                                         | no                      | 144                    | no clearly causative variant identified                                                    | not applicable              |                            |                                                        |                                 |                                              |                            |                                       |
| 18001837 | female | 4                                            | congenital cataracts                                                                         | no                      | 144                    | no clearly causative variant identified                                                    | not applicable              |                            |                                                        |                                 |                                              |                            |                                       |
| 16013003 | female | 1                                            | congenital cataracts                                                                         | no                      | 114                    | no clearly causative variant identified                                                    | not applicable              |                            |                                                        |                                 |                                              |                            |                                       |
| 15015181 | male   | 4                                            | congenital cataracts                                                                         | no                      | 114                    | no clearly causative variant identified;<br>ERCC3 c.1757delA p.(Gln586ArgfsTer25) het      | class 5 (pathogenic)        |                            |                                                        |                                 |                                              |                            |                                       |
| 17026533 | male   | 5                                            | congenital cataracts; posterior lenticonus                                                   | yes                     | 144                    | no clearly causative variant identified;<br>RECQL4 c.2492_2493del p.(His831ArgfsTer52) het | class 5 (pathogenic)        |                            |                                                        |                                 |                                              |                            |                                       |
| 15019612 | female | <1                                           | congenital cataracts;<br>microcornea;<br>Axenfeld-Rieger anomaly                             | yes                     | 114                    | no clearly causative variant identified                                                    | not applicable              |                            |                                                        |                                 |                                              |                            |                                       |
| 15000484 | male   | 4                                            | congenital cataracts;<br>high myopia                                                         | no                      | 114                    | no clearly causative variant identified                                                    | not applicable              |                            |                                                        |                                 |                                              |                            |                                       |
| 17022852 | male   | <1                                           | congenital cataracts; high myopia; global developmental delay; cerebral palsy                | no                      | 144                    | no clearly causative variant identified                                                    | not applicable              |                            |                                                        |                                 |                                              |                            |                                       |
| 16002025 | male   | <1                                           | congenital cataracts;<br>unilateral ptosis                                                   | no                      | 114                    | no clearly causative variant identified                                                    | not applicable              |                            |                                                        |                                 |                                              |                            |                                       |
| 14007961 | male   | 4                                            | congenital cataract; congenital glaucoma                                                     | no                      | 114                    | no clearly causative variant identified;<br>COL11A1 c.328G>C p.(Gly110Arg) het             | class 3 (VOUS)              |                            |                                                        |                                 |                                              |                            |                                       |
| 16016530 | female | 3                                            | congenital cataracts;<br>developmental delay                                                 | no                      | 144                    | no clearly causative variant identified                                                    | not applicable              |                            |                                                        |                                 |                                              |                            |                                       |
| 18004405 | male   | 3                                            | congenital cataracts;<br>developmental delay                                                 | no                      | 144                    | no clearly causative variant identified                                                    | not applicable              |                            |                                                        |                                 |                                              |                            |                                       |
| 15004516 | male   | 2                                            | congenital cataracts;<br>developmental delay;<br>microcephaly; infantile spasms              | no                      | 114                    | no clearly causative variant identified                                                    | not applicable              |                            |                                                        |                                 |                                              |                            |                                       |
| 12003591 | male   | 2                                            | congenital cataracts;<br>developmental delay;<br>microcephaly; hypospadias                   | no                      | 114                    | no clearly causative variant identified;<br>GALK1 c.997C>T p.(Leu333Trp) het               | class 4 (likely pathogenic) |                            |                                                        |                                 |                                              | metabolic work-up negative |                                       |
| 16015230 | female | 1                                            | congenital cataracts;<br>developmental delay;<br>polydactyly; periventricular polymicrogyria | no                      | 114                    | no clearly causative variant identified                                                    | not applicable              |                            |                                                        |                                 |                                              |                            |                                       |

| labno                                 | gender | age at referral for genetic testing in years | referral diagnosis                                             | relevant family history | number of genes tested | genotype                                                                             | ACMG variant classification          | avoiding unnecessary tests                     | initiating surveillance for extraocular manifestations | reducing prognostic uncertainty | determining eligibility for treatment trials | other / comment | case previously reported by our group |
|---------------------------------------|--------|----------------------------------------------|----------------------------------------------------------------|-------------------------|------------------------|--------------------------------------------------------------------------------------|--------------------------------------|------------------------------------------------|--------------------------------------------------------|---------------------------------|----------------------------------------------|-----------------|---------------------------------------|
| 14003960                              | male   | 4                                            | congenital cataracts; microcephaly; neonatal asphyxia          | no                      | genome sequencing      | no clearly causative variant identified                                              | not applicable                       |                                                |                                                        |                                 |                                              |                 |                                       |
| 14018514                              | male   | 4                                            | congenital cataracts; sparse scalp hair; narrow nasal passages | no                      | 114                    | no clearly causative variant identified                                              | not applicable                       |                                                |                                                        |                                 |                                              |                 |                                       |
| 15019481                              | female | 4                                            | congenital cataract; cerebral palsy; poroncephaly              | no                      | 114                    | no clearly causative variant identified                                              | not applicable                       |                                                |                                                        |                                 |                                              |                 |                                       |
| <b>bilateral ectopia lentis (n=8)</b> |        |                                              |                                                                |                         |                        |                                                                                      |                                      |                                                |                                                        |                                 |                                              |                 |                                       |
| 15022427.72                           | female | 3                                            | ectopia lentis                                                 | no                      | 144                    | LTBP2 c.507C>G p.(Cys169Trp) hom                                                     | class 3 (VOUS)                       | extensive systemic investigations not required |                                                        |                                 |                                              |                 |                                       |
| 16012251                              | female | 1                                            | ectopia lentis                                                 | no                      | 114                    | LTBP2 c.3427delC p.(Gln1143ArgfsTer35) hom                                           | class 5 (pathogenic)                 | extensive systemic investigations not required |                                                        |                                 |                                              |                 |                                       |
| 17008394                              | male   | 3                                            | ectopia lentis                                                 | no                      | 144                    | FBN1 c.356G>A p.(Cys119Tyr) het                                                      | class 3 (VOUS)                       |                                                | cardiology referral initiated                          |                                 |                                              |                 |                                       |
| 14000821                              | male   | 1                                            | ectopia lentis et pupillae                                     | no                      | 114                    | ADAMTSL4 c.767_786del hom                                                            | class 5 (pathogenic)                 | extensive systemic investigations not required |                                                        |                                 |                                              |                 |                                       |
| 13008723                              | male   | 5                                            | ectopia lentis                                                 | no                      | 114                    | ADAMTSL4 c.2236C>T p.(Arg746Cys) het; ADAMTSL4 c.767_786del p.(Gln256ProfsTer38) het | class 3 (VOUS); class 5 (pathogenic) | extensive systemic investigations not required |                                                        |                                 |                                              |                 |                                       |
| 17001295                              | female | 4                                            | ectopia lentis                                                 | no                      | 12                     | FBN1 c.6354C>T p.(Ile2118Ile) het                                                    | class 4 (likely pathogenic)          |                                                | cardiology referral initiated                          |                                 |                                              |                 |                                       |
| 15010654 & 15002428                   | female | 5                                            | ectopia lentis; heart defect                                   | yes                     | 114                    | no clearly causative variant identified                                              | not applicable                       |                                                |                                                        |                                 |                                              |                 |                                       |
| 17003542                              | male   | 4                                            | ectopia lentis; joint hypermobility                            | no                      | 144                    | no clearly causative variant identified; DHCR7 c.866C>T p.(Thr289Ile) het            | class 3 (VOUS)                       |                                                |                                                        |                                 |                                              |                 |                                       |

↓



| labno                                                                            | gender | age at referral for genetic testing in years | referral diagnosis                                                         | relevant family history | number of genes tested | genotype                                                                            | ACMG variant classification                              | avoiding unnecessary tests                  | initiating surveillance for extraocular manifestations | reducing prognostic uncertainty | determining eligibility for treatment trials | other / comment                                         | case previously reported by our group |
|----------------------------------------------------------------------------------|--------|----------------------------------------------|----------------------------------------------------------------------------|-------------------------|------------------------|-------------------------------------------------------------------------------------|----------------------------------------------------------|---------------------------------------------|--------------------------------------------------------|---------------------------------|----------------------------------------------|---------------------------------------------------------|---------------------------------------|
| bilateral anterior segment dysgenesis (ASD) including congenital glaucoma (n=28) |        |                                              |                                                                            |                         |                        |                                                                                     |                                                          |                                             |                                                        |                                 |                                              |                                                         |                                       |
| 16025893                                                                         | male   | 2                                            | corneal endothelial dystrophy                                              | no                      | 32                     | ZEB1 c.1440_1441del p.(Gln481AlafsTer2) het                                         | class 5 (pathogenic)                                     |                                             |                                                        |                                 |                                              |                                                         |                                       |
| 13013898                                                                         | male   | <1                                           | megalocornea; glaucoma                                                     | no                      | 114                    | LTBP2 c.3578_3581dup p.(Ser1195Ter) het; LTBP2 c.469delA p.(Thr157ProfsTer123) het  | class 5 (pathogenic); class 5 (pathogenic)               |                                             |                                                        |                                 |                                              |                                                         |                                       |
| 17012891                                                                         | female | 2                                            | aniridia                                                                   | yes                     | 45                     | PAX6 c.991C>T p.(Arg331Ter) het                                                     | class 5 (pathogenic)                                     | confirmed that risk of WAGR syndrome is low |                                                        |                                 |                                              |                                                         |                                       |
| 17015864                                                                         | male   | <1                                           | anterior segment dysgenesis                                                | no                      | 45                     | FOXE3 c.325C>A p.(Arg109Ser) het; FOXE3 c.555dupC p.(Phe186LeufsTer99) het          | class 3 (VOUS); class 4 (likely pathogenic)              |                                             |                                                        |                                 |                                              |                                                         |                                       |
| 17009449                                                                         | female | <1                                           | anterior segment dysgenesis                                                | no                      | 45                     | FOXC1 c.481A>G p.(Met161Val) het                                                    | class 4 (likely pathogenic)                              |                                             |                                                        |                                 |                                              |                                                         |                                       |
| 14018019                                                                         | female | <1                                           | congenital glaucoma; anterior segment dysgenesis; excess umbilical skin    | no                      | 114                    | PITX2 c.429_431del p.(Arg144del) het [de novo]                                      | class 4 (likely pathogenic)                              |                                             |                                                        |                                 |                                              |                                                         |                                       |
| 15022193                                                                         | male   | <1                                           | congenital glaucoma                                                        | no                      | 45                     | FOXC1 c.256C>T p.(Leu86Phe) het                                                     | class 4 (likely pathogenic)                              |                                             |                                                        |                                 |                                              |                                                         |                                       |
| 15022168                                                                         | male   | <1                                           | congenital glaucoma                                                        | no                      | 45                     | SBF2 c.141+1G>A hom                                                                 | class 5 (pathogenic)                                     |                                             | neurology referral initiated                           |                                 |                                              | family interested in pre-implantation genetic diagnosis |                                       |
| 16021601                                                                         | female | 4                                            | congenital glaucoma                                                        | no                      | 45                     | CYP1B1 c.1103G>A p.(Arg368His) het; CYP1B1 c.1159G>A p.(Glu387Lys) het              | class 4 (likely pathogenic); class 4 (likely pathogenic) |                                             |                                                        |                                 |                                              |                                                         |                                       |
| 16000470                                                                         | male   | <1                                           | congenital glaucoma                                                        | yes                     | 45                     | CYP1B1 c.1330C>T p.(Arg444Ter) hom                                                  | class 4 (likely pathogenic)                              |                                             |                                                        |                                 |                                              |                                                         |                                       |
| 18018901                                                                         | male   | 4                                            | congenital glaucoma                                                        | no                      | 45                     | CYP1B1 c.1103G>A p.(Arg368His) hom                                                  | class 4 (likely pathogenic)                              |                                             |                                                        |                                 |                                              |                                                         |                                       |
| 18007394                                                                         | male   | <1                                           | congenital glaucoma                                                        | no                      | 45                     | CYP1B1 c.241T>A p.(Tyr81Asn) het                                                    | class 3 (VOUS)                                           |                                             |                                                        |                                 |                                              |                                                         |                                       |
| 16000577                                                                         | female | 3                                            | megalocornea                                                               | yes                     | 32                     | no clearly causative variant identified; COL8A2 c.1466dupC p.(Gly490ArgfsTer49) het | class 3 (VOUS)                                           |                                             |                                                        |                                 |                                              |                                                         |                                       |
| 17022167                                                                         | female | <1                                           | posterior embryotoxa                                                       | no                      | 45                     | no clearly causative variant identified                                             | not applicable                                           |                                             |                                                        |                                 |                                              |                                                         |                                       |
| 17023814                                                                         | male   | <1                                           | anterior segment dysgenesis                                                | no                      | 45                     | no clearly causative variant identified                                             | not applicable                                           |                                             |                                                        |                                 |                                              |                                                         |                                       |
| 17014067                                                                         | male   | 3                                            | anterior segment dysgenesis; congenital aphakia; unilateral microphthalmia | no                      | 45                     | no clearly causative variant identified                                             | not applicable                                           |                                             |                                                        |                                 |                                              |                                                         |                                       |
| 16025403                                                                         | male   | 5                                            | anterior segment dysgenesis; abnormal teeth                                | no                      | 45                     | no clearly causative variant identified                                             | not applicable                                           |                                             |                                                        |                                 |                                              |                                                         |                                       |

| labno    | gender | age at referral for genetic testing in years | referral diagnosis                            | relevant family history | number of genes tested | genotype                                | ACMG variant classification | avoiding unnecessary tests | initiating surveillance for extraocular manifestations | reducing prognostic uncertainty | determining eligibility for treatment trials | other / comment | case previously reported by our group |
|----------|--------|----------------------------------------------|-----------------------------------------------|-------------------------|------------------------|-----------------------------------------|-----------------------------|----------------------------|--------------------------------------------------------|---------------------------------|----------------------------------------------|-----------------|---------------------------------------|
| 11012360 | male   | 3                                            | anterior segment dysgenesis; pyloric stenosis | no                      | genome sequencing      | no clearly causative variant identified | not applicable              |                            |                                                        |                                 |                                              |                 |                                       |
| 16018095 | male   | 5                                            | congenital glaucoma                           | no                      | 45                     | no clearly causative variant identified | not applicable              |                            |                                                        |                                 |                                              |                 |                                       |
| 17010130 | female | 4                                            | congenital glaucoma                           | no                      | 45                     | no clearly causative variant identified | not applicable              |                            |                                                        |                                 |                                              |                 |                                       |
| 17022448 | female | 1                                            | congenital glaucoma                           | no                      | 45                     | no clearly causative variant identified | not applicable              |                            |                                                        |                                 |                                              |                 |                                       |
| 18006601 | female | <1                                           | congenital glaucoma                           | no                      | 45                     | no clearly causative variant identified | not applicable              |                            |                                                        |                                 |                                              |                 |                                       |
| 15017091 | female | 3                                            | congenital glaucoma                           | no                      | 45                     | no clearly causative variant identified | not applicable              |                            |                                                        |                                 |                                              |                 |                                       |
| 16010439 | male   | <1                                           | congenital glaucoma                           | no                      | 45                     | no clearly causative variant identified | not applicable              |                            |                                                        |                                 |                                              |                 |                                       |
| 15005400 | male   | <1                                           | congenital glaucoma                           | no                      | 114                    | no clearly causative variant identified | not applicable              |                            |                                                        |                                 |                                              |                 |                                       |
| 17027068 | male   | <1                                           | congenital glaucoma                           | no                      | 45                     | no clearly causative variant identified | not applicable              |                            |                                                        |                                 |                                              |                 |                                       |
| 16018323 | male   | <1                                           | congenital glaucoma                           | no                      | 45                     | no clearly causative variant identified | not applicable              |                            |                                                        |                                 |                                              |                 |                                       |
| 16018928 | female | <1                                           | congenital glaucoma                           | yes                     | 45                     | no clearly causative variant identified | not applicable              |                            |                                                        |                                 |                                              |                 |                                       |

↓

| labno                            | gender | age at referral for genetic testing in years | referral diagnosis                                                                  | relevant family history | number of genes tested | genotype                                                                                                                                                             | ACMG variant classification                                                         | avoiding unnecessary tests | initiating surveillance for extraocular manifestations | reducing prognostic uncertainty                        | determining eligibility for treatment trials | other / comment | case previously reported by our group |
|----------------------------------|--------|----------------------------------------------|-------------------------------------------------------------------------------------|-------------------------|------------------------|----------------------------------------------------------------------------------------------------------------------------------------------------------------------|-------------------------------------------------------------------------------------|----------------------------|--------------------------------------------------------|--------------------------------------------------------|----------------------------------------------|-----------------|---------------------------------------|
| inherited retinal disease (n=59) |        |                                              |                                                                                     |                         |                        |                                                                                                                                                                      |                                                                                     |                            |                                                        |                                                        |                                              |                 |                                       |
| 18005694                         | female | 5                                            | achromatopsia                                                                       | no                      | 177                    | CNGA3 c.829C>T p.(Arg277Cys) hom                                                                                                                                     | class 4 (likely pathogenic)                                                         |                            |                                                        |                                                        |                                              |                 |                                       |
| 15003158                         | female | 5                                            | achromatopsia                                                                       | no                      | 177                    | CNGB3 c.904-2A>T hom                                                                                                                                                 | class 4 (likely pathogenic)                                                         |                            |                                                        |                                                        |                                              |                 | yes<br>[PMID:28341476]                |
| 16025366                         | female | 5                                            | achromatopsia                                                                       | no                      | 177                    | CNGB3 c.806T>C p.(Leu269Pro) hom                                                                                                                                     | class 3 (VOUS)                                                                      |                            |                                                        |                                                        |                                              |                 |                                       |
| 13000861                         | male   | 2                                            | cone/cone-rod dystrophy or achromatopsia                                            | no                      | 105                    | CNGB3 c.1148delC p.(Thr383IlefsTer13) hom                                                                                                                            | class 5 (pathogenic)                                                                |                            |                                                        | result suggested that the condition is non-progressive |                                              |                 |                                       |
| 14000069                         | male   | 3                                            | cone/cone-rod dystrophy or achromatopsia                                            | no                      | 105                    | CNGB3 c.901C>T p.(Gln301Ter) het;<br>CNGB3 c.1148delC p.(Thr383IlefsTer13) het                                                                                       | class 5 (pathogenic);<br>class 5 (pathogenic)                                       |                            |                                                        | result suggested that the condition is non-progressive |                                              |                 | yes<br>[PMID:28341476]                |
| 14012482                         | female | 3                                            | cone/cone-rod dystrophy or achromatopsia                                            | no                      | 177                    | CNGB3 c.1148delC p.(Thr383IlefsTer13) het;<br>CNGB3 c.190delG p.(Glu64SerfsTer19) het;<br>CDH23 c.3293A>G p.(Asn1098Ser) het;<br>CEP164 c.4228C>T p.(Gln1410Ter) het | class 5 (pathogenic);<br>class 5 (pathogenic);<br>class 3 (VOUS);<br>class 3 (VOUS) |                            |                                                        | result suggested that the condition is non-progressive |                                              |                 | yes<br>[PMID:28341476]                |
| 16019712                         | female | 4                                            | cone/cone-rod dystrophy or achromatopsia                                            | no                      | 177                    | CNGB3 c.806T>C p.(Leu269Pro) hom                                                                                                                                     | class 3 (VOUS)                                                                      |                            |                                                        | result suggested that the condition is non-progressive |                                              |                 |                                       |
| 15011628                         | male   | 4                                            | cone/cone-rod dystrophy or achromatopsia                                            | no                      | 177                    | GNAT2 c.605G>A p.(Gly202Glu) hom;<br>ABCA4 c.5882G>A p.(Gly1961Glu) het                                                                                              | class 3 (VOUS);<br>class 5 (pathogenic)                                             |                            |                                                        | result suggested that the condition is non-progressive |                                              |                 | yes<br>[PMID:28341476]                |
| 18012826                         | male   | 2                                            | cone/cone-rod dystrophy or achromatopsia (initially idiopathic infantile nystagmus) | no                      | 177                    | CEP290 c.1709C>G p.(Ser570Ter) het;<br>CEP290 c.2414T>C p.(Leu805Pro) het                                                                                            | class 5 (pathogenic);<br>class 3 (VOUS)                                             |                            | renal screening initiated                              | result suggested that the condition is non-progressive |                                              |                 |                                       |
| 18012804                         | female | <1                                           | cone/cone-rod dystrophy                                                             | no                      | 177                    | CNGB3 c.1148delC p.(Thr383IlefsTer13) hom                                                                                                                            | class 5 (pathogenic)                                                                |                            |                                                        | result suggested that the condition is non-progressive |                                              |                 |                                       |
| 15020633                         | female | 4                                            | cone/cone-rod dystrophy                                                             | no                      | 177                    | KCNV2 c.562T>C p.(Trp188Arg) hom                                                                                                                                     | class 3 (VOUS)                                                                      |                            |                                                        | result suggested that the condition is non-progressive |                                              |                 |                                       |
| 17006564                         | female | 5                                            | cone/cone-rod dystrophy                                                             | no                      | 177                    | PROM1 c.1354dupT p.(Tyr452LeufsTer13) het;<br>PROM1 c.436C>T p.(Arg146Ter) het                                                                                       | class 5 (pathogenic);<br>class 4 (likely pathogenic)                                |                            |                                                        |                                                        |                                              |                 |                                       |
| 16023111                         | male   | 3                                            | congenital stationary synaptic dysfunction or retinal dystrophy                     | no                      | 177                    | CACNA1F c.2131G>T p.(Glu711Ter) hemi                                                                                                                                 | class 5 (pathogenic)                                                                |                            |                                                        | result suggested that the condition is non-progressive |                                              |                 |                                       |
| 17002921                         | male   | 3                                            | congenital stationary synaptic dysfunction or retinal dystrophy                     | no                      | 177                    | CACNA1F c.1561C>T p.(Arg521Cys) hemi                                                                                                                                 | class 3 (VOUS)                                                                      |                            |                                                        | result suggested that the condition is non-progressive |                                              |                 |                                       |
| 14002269                         | male   | 1                                            | congenital stationary synaptic dysfunction or retinal dystrophy                     | yes                     | 177                    | CACNA1F c.4301A>G p.(Asn1434Ser) hemi;<br>BBS1 c.1169T>G p.(Met390Arg) het;<br>CHM c.1922_1933dup p.(Asn644_Leu645insGlnSerThrAsn) hemi                              | class 3 (VOUS);<br>class 5 (pathogenic);<br>class 3 (VOUS)                          |                            |                                                        | result suggested that the condition is non-progressive |                                              |                 | yes<br>[PMID:28341476]                |
| 14017012                         | male   | 4                                            | congenital stationary synaptic dysfunction or retinal dystrophy                     | yes                     | 177                    | CACNA1F c.3289G>A p.(Asp1097Asn) hemi                                                                                                                                | class 3 (VOUS)                                                                      |                            |                                                        | result suggested that the condition is non-progressive |                                              |                 | yes<br>[PMID:28341476]                |
| 18011541                         | male   | 5                                            | congenital stationary synaptic dysfunction                                          | no                      | 177                    | CACNA1F c.4093_4095del p.(Asn1365del) hemi                                                                                                                           | class 3 (VOUS)                                                                      |                            |                                                        |                                                        |                                              |                 |                                       |

| labno    | gender | age at referral for genetic testing in years | referral diagnosis                         | relevant family history | number of genes tested | genotype                                                                                                     | ACMG variant classification                                                               | avoiding unnecessary tests | initiating surveillance for extraocular manifestations | reducing prognostic uncertainty                    | determining eligibility for treatment trials            | other / comment | case previously reported by our group |
|----------|--------|----------------------------------------------|--------------------------------------------|-------------------------|------------------------|--------------------------------------------------------------------------------------------------------------|-------------------------------------------------------------------------------------------|----------------------------|--------------------------------------------------------|----------------------------------------------------|---------------------------------------------------------|-----------------|---------------------------------------|
| 18004252 | male   | 3                                            | congenital stationary synaptic dysfunction | yes                     | 177                    | CACNA1F c.868C>T p.(Arg290Cys) hemi                                                                          | class 3 (VOUS)                                                                            |                            |                                                        |                                                    |                                                         |                 |                                       |
| 16004896 | male   | 1                                            | congenital stationary night blindness      | yes                     | 177                    | NYX c.212G>C p.(Arg71Pro) hemi;<br>EYS c.8133_8137del p.(Phe2712CysfsTer33) het                              | class 3 (VOUS);<br>class 4 (likely pathogenic)                                            |                            |                                                        |                                                    |                                                         |                 | yes<br>[PMID:28341476]                |
| 16001150 | male   | 5                                            | congenital stationary night blindness      | yes                     | 177                    | NYX c.85_108del p.(Arg29_Ala36del) hemi                                                                      | class 5 (pathogenic)                                                                      |                            |                                                        |                                                    |                                                         |                 | yes<br>[PMID:28341476]                |
| 15015157 | male   | 4                                            | congenital stationary night blindness      | no                      | 177                    | RHO c.328T>C p.(Cys110Arg) het                                                                               | class 4 (likely pathogenic)                                                               |                            |                                                        |                                                    |                                                         |                 | yes<br>[PMID:28341476]                |
| 11010142 | male   | 6                                            | retinal dystrophy                          | no                      | 177                    | NYX c.106_111del p.(Ala36_Cys37del) hemi                                                                     | class 4 (likely pathogenic)                                                               |                            |                                                        | result suggested that condition is non-progressive |                                                         |                 | yes<br>[PMID:28341476]                |
| 15011865 | female | <1                                           | retinal dystrophy                          | no                      | 177                    | CNGA3 c.667C>T p.(Arg223Trp) het<br>CNGA3 c.1279C>T p.(Arg427Cys) het                                        | class 3 (VOUS);<br>class 4 (likely pathogenic)                                            |                            |                                                        | result suggested that condition is non-progressive |                                                         |                 | yes<br>[PMID:28341476]                |
| 16009408 | male   | 3                                            | retinal dystrophy                          | no                      | 177                    | CABP4 c.673C>T p.(Arg225Ter) hom                                                                             | class 4 (likely pathogenic)                                                               |                            |                                                        | result suggested that condition is non-progressive |                                                         |                 | yes<br>[PMID:28341476]                |
| 13015227 | male   | <1                                           | retinal dystrophy                          | no                      | 105                    | RPE65 c.726-2A>C hom;<br>CEP290 c.7171_7172del p.(Gln2391AlafsTer26) het                                     | class 5 (pathogenic);<br>class 3 (VOUS)                                                   |                            |                                                        |                                                    | as per<br>PMID:28712537;<br>formally approved treatment |                 |                                       |
| 17027106 | male   | 3                                            | retinal dystrophy                          | no                      | 177                    | RDH12 c.601T>C p.(Cys201Arg) hom                                                                             | class 5 (pathogenic)                                                                      |                            |                                                        |                                                    |                                                         |                 |                                       |
| 12013881 | female | 5                                            | retinal dystrophy                          | yes                     | 105                    | RDH12 c.601T>C p.(Cys201Arg) hom;<br>AIPL1 c.465G>T p.(Gln155His) het                                        | class 5 (pathogenic);<br>class 3 (VOUS)                                                   |                            |                                                        |                                                    |                                                         |                 |                                       |
| 14003957 | female | 5                                            | retinal dystrophy                          | no                      | 105                    | RDH12 c.506G>A p.(Arg169Gln) het;<br>RDH12 c.883C>T p.(Arg295Ter) het;<br>ABCA4 c.5882G>A p.(Gly1961Glu) het | class 4 (likely pathogenic);<br>class 3 (VOUS);<br>class 5 (pathogenic)                   |                            |                                                        |                                                    |                                                         |                 | yes<br>[PMID:28341476]                |
| 18001788 | male   | 4                                            | retinal dystrophy                          | no                      | 177                    | AIPL1 c.834G>A p.(Trp278Ter) het<br>AIPL1 c.[643-5G>A; 784G>A] p.[?];(Gly262Ser)] het                        | class 5 (pathogenic);<br>class 3 (VOUS) <i>in cis</i> with<br>class 4 (likely pathogenic) |                            |                                                        |                                                    |                                                         |                 |                                       |
| 17016701 | male   | 3                                            | retinal dystrophy                          | no                      | 177                    | AIPL1 c.834G>A p.(Trp278Ter) hom                                                                             | class 5 (pathogenic)                                                                      |                            |                                                        |                                                    |                                                         |                 |                                       |
| 15014189 | male   | 1                                            | retinal dystrophy                          | no                      | 177                    | GUCY2D c.2837C>A p.(Ala946Glu) het;<br>GUCY2D c.2595del G p.(Lys866ArgfsTer14) het                           | class 3 (VOUS);<br>class 5 (pathogenic)                                                   |                            |                                                        |                                                    |                                                         |                 | yes<br>[PMID:28341476]                |
| 12007217 | male   | 3                                            | retinal dystrophy                          | no                      | 105                    | CEP290 c.2991+1665A>G het;<br>CEP290 c.4966G>T p.(Glu1656Ter) het                                            | Class 5; Pathogenic;<br>Class 5; Pathogenic                                               |                            | renal screening initiated                              |                                                    | as per PMID:<br>30559420                                |                 |                                       |
| 12004181 | male   | 1                                            | retinal dystrophy                          | no                      | 105                    | CEP290 c.451C>T p.(Arg151Ter) het;<br>CEP290 c.3181_3182del het                                              | class 5 (pathogenic);<br>class 5 (pathogenic)                                             |                            | renal screening initiated                              |                                                    |                                                         |                 |                                       |
| 15004850 | male   | 5                                            | retinal dystrophy                          | no                      | 177                    | NRL c.479T>C p.(Leu160Pro) hom;<br>CACNA1F c.1903G>A p.(Val635Ile) hemi                                      | class 5 (pathogenic);<br>class 3 (VOUS)                                                   |                            |                                                        |                                                    |                                                         |                 | yes<br>[PMID:28341476]                |
| 15004859 | male   | 2                                            | retinal dystrophy                          | no                      | 177                    | RPGRI1 c.2079C>G p.(Tyr693Ter) het;<br>RPGRI1 ex19 del het;<br>ABCA4 c.5196+1136C>A het                      | class 5 (pathogenic);<br>class 4 (likely pathogenic);<br>class 3 (VOUS)                   |                            |                                                        |                                                    |                                                         |                 | yes<br>[PMID:28341476]                |

| labno    | gender | age at referral for genetic testing in years | referral diagnosis                                               | relevant family history | number of genes tested | genotype                                                                                                         | ACMG variant classification                                                                              | avoiding unnecessary tests | initiating surveillance for extraocular manifestations | reducing prognostic uncertainty | determining eligibility for treatment trials | other / comment                                         | case previously reported by our group |
|----------|--------|----------------------------------------------|------------------------------------------------------------------|-------------------------|------------------------|------------------------------------------------------------------------------------------------------------------|----------------------------------------------------------------------------------------------------------|----------------------------|--------------------------------------------------------|---------------------------------|----------------------------------------------|---------------------------------------------------------|---------------------------------------|
| 18012273 | male   | 5                                            | retinal dystrophy                                                | no                      | 177                    | CRB1 c.2536G>A p.(Gly846Arg) hom                                                                                 | class 4 (likely pathogenic)                                                                              |                            |                                                        |                                 |                                              |                                                         |                                       |
| 14009965 | male   | 3                                            | retinal dystrophy; macular edema                                 | no                      | 105                    | CRB1 c.584G>T p.(Cys195Phe) het; CRB1 c.2843G>A p.(Cys948Tyr) het                                                | class 4 (likely pathogenic); class 4 (likely pathogenic)                                                 |                            |                                                        |                                 |                                              |                                                         | yes [PMID:28341476]                   |
| 12000202 | female | 5                                            | retinal dystrophy; hearing impairment                            | no                      | 105                    | MYO7A c.[905G>A; 5899C>T] p.[(Arg302His);(Arg1967Ter)] het; MYO7A c.[132+5G>A; 1135G>A] p.[(?);(Gly379Arg)] het; | class 3 (VOUS) <i>in cis</i> with class 5 (pathogenic); class 3 (VOUS) <i>in cis</i> with class 3 (VOUS) |                            |                                                        |                                 |                                              |                                                         |                                       |
| 14002664 | male   | 1                                            | retinal dystrophy; polydactyly; micropenis; obesity              | no                      | 105                    | BBS1 c.1339G>A p.(Ala447Thr) hom                                                                                 | class 4 (likely pathogenic)                                                                              |                            | cardiology referral initiated                          |                                 |                                              |                                                         | yes [PMID:28341476]                   |
| 13009772 | female | <1                                           | retinal dystrophy; polydactyly; recurrent chest infections       | no                      | 105                    | CEP290 c.5668G>T p.(Gly1890Ter) hom; CNGB3 c.1208G>A p.(Arg403Gln) het                                           | class 5 (pathogenic); class 3 (VOUS)                                                                     |                            | renal screening initiated                              |                                 |                                              |                                                         |                                       |
| 12002598 | male   | 3                                            | retinal dystrophy; learning difficulties; anosmia; obesity       | no                      | 105                    | BBS9 c.1877_1880del p.(Lys626ArgfsTer22) het; IMPDH1 c.189A>G p.(Ser63Ser) het                                   | class 5 (pathogenic); class 3 (VOUS)                                                                     |                            | renal screening initiated                              |                                 |                                              |                                                         |                                       |
| 16026573 | male   | 2                                            | retinal dystrophy                                                | no                      | 177                    | GUCY2D c.2837C>A p.(Ala946Glu) het                                                                               | class 3 (VOUS)                                                                                           |                            |                                                        |                                 |                                              |                                                         |                                       |
| 18007064 | female | <1                                           | retinal dystrophy                                                | no                      | 177                    | no clearly causative variant identified                                                                          | not applicable                                                                                           |                            |                                                        |                                 |                                              |                                                         |                                       |
| 13016425 | male   | 3                                            | retinal dystrophy                                                | no                      | 105                    | no clearly causative variant identified                                                                          | not applicable                                                                                           |                            |                                                        |                                 |                                              |                                                         |                                       |
| 18008440 | male   | 5                                            | retinal dystrophy; unilateral retinal detachment                 | no                      | 177                    | no clearly causative variant identified                                                                          | not applicable                                                                                           |                            |                                                        |                                 |                                              |                                                         |                                       |
| 18012137 | male   | 3                                            | retinal dystrophy; unilateral congenital cataract                | no                      | 177                    | no clearly causative variant identified                                                                          | not applicable                                                                                           |                            |                                                        |                                 |                                              |                                                         |                                       |
| 17001549 | female | 3                                            | macular dystrophy                                                | no                      | 177                    | no clearly causative variant identified                                                                          | not applicable                                                                                           |                            |                                                        |                                 |                                              |                                                         |                                       |
| 13016423 | male   | 1                                            | retinal dystrophy; global developmental delay; truncal hypotonia | no                      | genome sequencing      | POMGNT1 c.1342G>C p.(Gly448Arg) het; POMGNT1 c.1769G>A p.(Trp590Ter) het                                         | class 4 (likely pathogenic); class 5 (pathogenic)                                                        |                            |                                                        |                                 |                                              | family interested in pre-implantation genetic diagnosis | yes [PMID:28341476]                   |
| 12009678 | female | 4                                            | retinal dystrophy; developmental delay; cerebellar atrophy       | no                      | 177                    | no clearly causative variant identified                                                                          | not applicable                                                                                           |                            |                                                        |                                 |                                              |                                                         | yes [PMID:28341476]                   |
| 14012857 | female | 5                                            | retinal dystrophy; polydactyly; obesity; vaginal & anal atresia  | no                      | genome sequencing      | no clearly causative variant identified                                                                          | not applicable                                                                                           |                            |                                                        |                                 |                                              |                                                         | yes [PMID:28341476]                   |
| 17030562 | female | 4                                            | retinal dystrophy; digit abnormalities; obesity                  | no                      | 177                    | no clearly causative variant identified                                                                          | not applicable                                                                                           |                            |                                                        |                                 |                                              |                                                         |                                       |
| 14021804 | male   | 2                                            | retinoschisis                                                    | yes                     | 177                    | RS1 c.592_600dup p.(Arg200_Leu201insPhelleArg) hemi                                                              | class 3 (VOUS)                                                                                           |                            |                                                        |                                 |                                              | surveillance for retinal detachment initiated           | yes [PMID:28341476]                   |
| 17029101 | male   | 2                                            | retinoschisis                                                    | no                      | 177                    | RS1 c.305G>A p.(Arg102Gln) hemi                                                                                  | class 4 (likely pathogenic)                                                                              |                            |                                                        |                                 |                                              |                                                         |                                       |

| labno    | gender | age at referral for genetic testing in years | referral diagnosis                                         | relevant family history | number of genes tested | genotype                                                                    | ACMG variant classification          | avoiding unnecessary tests | initiating surveillance for extraocular manifestations | reducing prognostic uncertainty | determining eligibility for treatment trials | other / comment                               | case previously reported by our group |
|----------|--------|----------------------------------------------|------------------------------------------------------------|-------------------------|------------------------|-----------------------------------------------------------------------------|--------------------------------------|----------------------------|--------------------------------------------------------|---------------------------------|----------------------------------------------|-----------------------------------------------|---------------------------------------|
| 17018420 | male   | <1                                           | vitreoretinal dysplasia                                    | no                      | 177                    | RS1 c.35T>A p.(Leu12His) hemi                                               | class 4 (likely pathogenic)          |                            |                                                        |                                 |                                              | surveillance for retinal detachment initiated |                                       |
| 12000347 | male   | 1                                            | exudative vitreoretinopathy                                | no                      | 105                    | FZD4 c.313A>G p.(Met105Val) het                                             | class 4 (likely pathogenic)          |                            |                                                        |                                 |                                              |                                               |                                       |
| 17011544 | female | 4                                            | exudative vitreoretinopathy                                | no                      | 177                    | no clearly causative variant identified                                     | not applicable                       |                            |                                                        |                                 |                                              |                                               |                                       |
| 15023722 | female | 1                                            | vitreoretinal dysplasia; microcephaly; developmental delay | no                      | 177                    | KIF11 c.478_479del p.(Leu160ValfsTer5) het; NPHP4 c.271T>C p.(Phe91Leu) het | class 5 (pathogenic); class 3 (VOUS) |                            |                                                        |                                 |                                              |                                               | yes [PMID:28341476]                   |
| 16004891 | female | 2                                            | vitreoretinal dysplasia; porencephaly; developmental delay | no                      | 177                    | no clearly causative variant identified                                     | not applicable                       |                            |                                                        |                                 |                                              |                                               |                                       |
| 14009949 | female | 4                                            | vitreoretinopathy; microcephaly                            | no                      | 177                    | no clearly causative variant identified                                     | not applicable                       |                            |                                                        |                                 |                                              |                                               |                                       |

^ ACMG corresponds to the American College of Medical Genetics and Genomics (the variant classification shown is according to PMID: 25741868);  
VOUS corresponds to variant of unknown significance

**Supplementary Table 2: Genes and transcripts included in panels that were used to test children with bilateral cataracts, ectopia lentis or anterior segment dysgenesis (114 gene panel; samples tested between September 2011 and August 2016)**

| Gene (HGNC)        | Transcript                                  | Gene (HGNC)    | Transcript                            | Gene (HGNC)         | Transcript                            | Gene (HGNC)         | Transcript                                  |
|--------------------|---------------------------------------------|----------------|---------------------------------------|---------------------|---------------------------------------|---------------------|---------------------------------------------|
| <b>ADAMTSL4</b>    | NM_019032.4                                 | <b>ERCC8</b>   | NM_000082.3                           | <b>NDP</b>          | NM_000266.3                           | <b>SC5DL</b>        | NM_001024956.2                              |
| <b>AGK</b>         | NM_018238.3                                 | <b>EYA1</b>    | NM_172058.2; NM_172060.2              | <b>NF2</b>          | NM_000268.3; NM_016418.5; NM_181832.2 | <b>SEC23A</b>       | NM_006364.2                                 |
| <b>AGPS</b>        | NM_003659.3                                 | <b>FAM126A</b> | NM_032581.3                           | <b>NHS</b>          | NM_198270.2; NM_001136024.2           | <b>SIL1</b>         | NM_001037633.1                              |
| <b>AKR1E2</b>      | NM_001040177.1                              | <b>FBN1</b>    | NM_000138.4                           | <b>OCRL</b>         | NM_000276.3                           | <b>SIX5</b>         | NM_175875.4                                 |
| <b>ALDH18A1</b>    | NM_002860.3                                 | <b>FKRP</b>    | NM_001039885.2                        | <b>OPA3</b>         | NM_001017989.2                        | <b>SIX6</b>         | NM_007374.2                                 |
| <b>B3GALTL</b>     | NM_194318.3                                 | <b>FKTN</b>    | NM_006731.2                           | <b>PAX6</b>         | NM_001604.4                           | <b>SLC16A12</b>     | NM_213606.3                                 |
| <b>BCOR</b>        | NM_017745.5; NM_001123385.1; NM_001123384.1 | <b>FOXC1</b>   | NM_001453.2                           | <b>PEX1</b>         | NM_000466.2                           | <b>SLC2A1</b>       | NM_006516.2                                 |
| <b>BFSP1</b>       | NM_001195.3                                 | <b>FOXD3</b>   | NM_012183.2                           | <b>PEX12</b>        | NM_000286.2                           | <b>SLC33A1</b>      | NM_004733.3                                 |
| <b>BFSP2</b>       | NM_003571.2                                 | <b>FOXE3</b>   | NM_012186.2                           | <b>PEX13</b>        | NM_002618.3                           | <b>SOLH</b>         | NM_005632.2                                 |
| <b>CBS (ABHD5)</b> | NM_000071.2                                 | <b>FTL</b>     | NM_000146.3                           | <b>PEX16</b>        | NM_057174.2; NM_004813.2              | <b>SOX2</b>         | NM_003106.3                                 |
| <b>CHMP4B</b>      | NM_176812.4                                 | <b>FYCO1</b>   | NM_024513.2                           | <b>PEX2</b>         | NM_001172086.1                        | <b>SRD5A3</b>       | NM_024592.4                                 |
| <b>COL18A1</b>     | NM_130445.2                                 | <b>FZD4</b>    | NM_012193.3                           | <b>PEX26</b>        | NM_017929.5                           | <b>SREBF2</b>       | NM_004599.2                                 |
| <b>COL2A1</b>      | NM_001844.4                                 | <b>GALK1</b>   | NM_000154.1                           | <b>PEX3</b>         | NM_003630.2                           | <b>TDRD7</b>        | NM_014290.2                                 |
| <b>COL4A1</b>      | NM_001845.4                                 | <b>GALT</b>    | NM_000155.2                           | <b>PEX6</b>         | NM_000287.3                           | <b>TFAP2A</b>       | NM_003220.2; NM_001042425.1; NM_001032280.2 |
| <b>COL11A1</b>     | NM_001854.3                                 | <b>GCNT2</b>   | NM_145649.4; NM_145655.3; NM_001491.2 | <b>PEX7</b>         | NM_000288.3                           | <b>TMEM70</b>       | NM_017866.5                                 |
| <b>CRYAA</b>       | NM_000394.2                                 | <b>GJA1</b>    | NM_000165.3                           | <b>PEX5L</b>        | NM_016559.2                           | <b>TMEM114</b>      | NM_001146336.1                              |
| <b>CRYAB</b>       | NM_001885.1                                 | <b>GJA3</b>    | NM_021954.3                           | <b>PEX10</b>        | NM_153818.1                           | <b>VIM</b>          | NM_003380.3                                 |
| <b>CRYBA1</b>      | NM_005208.4                                 | <b>GJA8</b>    | NM_005267.4                           | <b>PEX11B</b>       | NM_003846.2                           | <b>VSX2 (CHX10)</b> | NM_182894.2                                 |
| <b>CRYBA4</b>      | NM_001886.2                                 | <b>GNPAT</b>   | NM_014236.3                           | <b>PEX14</b>        | NM_004565.2                           |                     |                                             |
| <b>CRYBB1</b>      | NM_001887.3                                 | <b>HMX1</b>    | NM_018942.2                           | <b>PEX19</b>        | NM_002857.3                           |                     |                                             |
| <b>CRYBB2</b>      | NM_000496.2                                 | <b>HSF4</b>    | NM_001040667.2                        | <b>PITX2</b>        | NM_000325.5; NM_153426.1              |                     |                                             |
| <b>CRYBB3</b>      | NM_004076.3                                 | <b>JAM3</b>    | NM_032801.3                           | <b>PITX3</b>        | NM_005029.3                           |                     |                                             |
| <b>CRYGC</b>       | NM_020989.3                                 | <b>LARGE</b>   | NM_004737.4                           | <b>POMT1</b>        | NM_007171.3                           |                     |                                             |
| <b>CRYGD</b>       | NM_006891.3                                 | <b>LMX1B</b>   | NM_001174146.1                        | <b>POMT2</b>        | NM_013382.5                           |                     |                                             |
| <b>CRYGS</b>       | NM_017541.2                                 | <b>LRP5</b>    | NM_002335.2                           | <b>PVRL3</b>        | NM_015480.1                           |                     |                                             |
| <b>CYP27A1</b>     | NM_000784.3                                 | <b>LTBP2</b>   | NM_000428.2                           | <b>PXDN</b>         | NM_012293.1                           |                     |                                             |
| <b>CYP51A1</b>     | NM_000786.3                                 | <b>MAF</b>     | NM_005360.4                           | <b>RAB18</b>        | NM_021252.3                           |                     |                                             |
| <b>DHCR7</b>       | NM_001360.2                                 | <b>MAN2B1</b>  | NM_002372.2                           | <b>RAB3GAP1</b>     | NM_001172435.1                        |                     |                                             |
| <b>EPHA2</b>       | NM_004431.3                                 | <b>MFSD6L</b>  | NM_152599.3                           | <b>RAB3GAP2</b>     | NM_012414.3                           |                     |                                             |
| <b>ERCC2</b>       | NM_000400.3                                 | <b>MIP</b>     | NM_012064.3                           | <b>RECQL2 (WRN)</b> | NM_000553.4                           |                     |                                             |
| <b>ERCC3</b>       | NM_000122.1                                 | <b>MIR184</b>  | NR_029705.1                           | <b>RECQL4</b>       | NM_004260.3                           |                     |                                             |

**Supplementary Table 3:** Genes and transcripts included in panels that were used to test children with bilateral cataracts, ectopia lentis or anterior segment dysgenesis (144 gene panel; samples tested between September 2016 and August 2018)

| Gene (HGNC)         | Transcript                                  | Gene (HGNC)         | Transcript                                  | Gene (HGNC)           | Transcript                            | Gene (HGNC)         | Transcript                                             |
|---------------------|---------------------------------------------|---------------------|---------------------------------------------|-----------------------|---------------------------------------|---------------------|--------------------------------------------------------|
| <b>ABCA3</b>        | NM_001089.2                                 | <b>CYP27A1</b>      | NM_000784.3                                 | <b>LEPREL1 (P3H2)</b> | NM_018192.3                           | <b>PVRL3</b>        | NM_015480.1                                            |
| <b>ABHD12</b>       | NM_001042472.2; NM_015600.4                 | <b>CYP51A1</b>      | NM_000786.3                                 | <b>LIM2</b>           | NM_030657.3                           | <b>PXDN</b>         | NM_012293.1                                            |
| <b>ABHD5 (CDS)</b>  | NM_016006.4                                 | <b>DHCR7</b>        | NM_001360.2                                 | <b>LONP1</b>          | NM_004793.3                           | <b>RAB18</b>        | NM_021252.3                                            |
| <b>ADAMTS10</b>     | NM_030957.2                                 | <b>DNAJB1</b>       | NM_006145.2; NM_001313964.1; NM_001300914.1 | <b>LRP2</b>           | NM_004525.2                           | <b>RAB3GAP1</b>     | NM_001172435.1                                         |
| <b>ADAMTS17</b>     | NM_139057.2                                 | <b>EBP</b>          | NM_006579.2                                 | <b>LSS</b>            | NM_002340.5                           | <b>RAB3GAP2</b>     | NM_012414.3                                            |
| <b>ADAMTSL4</b>     | NM_019032.4                                 | <b>EIF2B2</b>       | NM_014239.3                                 | <b>LTBP2</b>          | NM_000428.2                           | <b>RECQL2 (WRN)</b> | NM_000553.4                                            |
| <b>AGK</b>          | NM_018238.3                                 | <b>EPG5</b>         | NM_020964.2                                 | <b>MAF</b>            | NM_005360.4                           | <b>RECQL4</b>       | NM_004260.3                                            |
| <b>AGPS</b>         | NM_003659.3                                 | <b>EPHA2</b>        | NM_004431.3                                 | <b>MAN2A1</b>         | NM_002372.2                           | <b>RGS6</b>         | NM_001204416; NM_001204417.1                           |
| <b>AKR1E2</b>       | NM_001040177.1                              | <b>ERCC2</b>        | NM_000400.3                                 | <b>MAN2B1</b>         | NM_002372.2                           | <b>RNLS</b>         | NM_001031709.2; NM_018363.3                            |
| <b>ALDH18A1</b>     | NM_002860.3                                 | <b>ERCC3</b>        | NM_000122.1                                 | <b>MED25</b>          | NM_030973.3                           | <b>SC5DL</b>        | NM_001024956.2                                         |
| <b>ATOH7</b>        | NM_145178.3                                 | <b>ERCC6</b>        | NM_000124.2                                 | <b>MFSD6L</b>         | NM_152599.3                           | <b>SEC23A</b>       | NM_006364.2                                            |
| <b>BCOR</b>         | NM_017745.5; NM_001123385.1; NM_001123384.1 | <b>ERCC8</b>        | NM_000082.3                                 | <b>MIP</b>            | NM_012064.3                           | <b>SIL1</b>         | NM_001037633.1                                         |
| <b>BFSP1</b>        | NM_001195.3                                 | <b>EYA1</b>         | NM_172058.2; NM_172060.2                    | <b>MIR184</b>         | NR_029705.1                           | <b>SIPA1L3</b>      | NM_015073.2                                            |
| <b>BFSP2</b>        | NM_003571.2                                 | <b>FAM126A</b>      | NM_032581.3                                 | <b>MVK</b>            | NM_000431.2                           | <b>SIX5</b>         | NM_175875.4                                            |
| <b>CAV1</b>         | NM_001753.4                                 | <b>FAR1</b>         | NM_032228.5                                 | <b>MYH9</b>           | NM_002473.4                           | <b>SLC16A12</b>     | NM_213606.3                                            |
| <b>CBS</b>          | NM_00071.2                                  | <b>FBN1</b>         | NM_000138.4                                 | <b>NDP</b>            | NM_000266.3                           | <b>SLC2A1</b>       | NM_006516.2                                            |
| <b>CHMBP4B</b>      | NM_176812.4                                 | <b>FKRP</b>         | NM_001039885.2                              | <b>NF2</b>            | NM_000268.3; NM_016418.5; NM_181832.2 | <b>SLC33A1</b>      | NM_004733.3                                            |
| <b>CHRDL1</b>       | NM_001143981                                | <b>FKTN</b>         | NM_006731.2                                 | <b>NHS</b>            | NM_198270.2; NM_001136024.2           | <b>SOLH</b>         | NM_005632.2                                            |
| <b>CHX10 (VSX2)</b> | NM_182894.2                                 | <b>FOXD3</b>        | NM_012183.2                                 | <b>OAT</b>            | NM_000274.3                           | <b>SRD5A3</b>       | NM_024592.4                                            |
| <b>CLPB</b>         | NM_030813.4; NM_001258394.2                 | <b>FOXE3</b>        | NM_012186.2                                 | <b>OCRL</b>           | NM_000276.3                           | <b>SREBF2</b>       | NM_004599.2                                            |
| <b>COL11A1</b>      | NM_001854.3                                 | <b>FTL promoter</b> | NM_000146.3                                 | <b>OPA3</b>           | NM_001017989.2; NM_025136.3           | <b>TBC1D20</b>      | NM_144628.3                                            |
| <b>COL18A1</b>      | NM_130445.2                                 | <b>FYCO1</b>        | NM_024513.2                                 | <b>OTX2</b>           | NM_021728.3                           | <b>TDRD7</b>        | NM_014290.2                                            |
| <b>COL2A1</b>       | NM_001844.4                                 | <b>GALK1</b>        | NM_000154.1                                 | <b>PAX6</b>           | NM_001604.4                           | <b>TFAP2A</b>       | NM_003220.2; NM_001042425.1; NM_001032280.2            |
| <b>COL4A1</b>       | NM_001845.4                                 | <b>GALT</b>         | NM_000155.2                                 | <b>PEX1</b>           | NM_000466.2                           | <b>TMEM114</b>      | NM_001146336                                           |
| <b>CRYAA</b>        | NM_000394.2                                 | <b>GBA2</b>         | NM_020944.2                                 | <b>PEX12</b>          | NM_000286.2                           | <b>TMEM70</b>       | NM_017866.5                                            |
| <b>CRYAB</b>        | NM_001885.1                                 | <b>GCNT2</b>        | NM_145649.4; NM_145655.3; NM_001491.2       | <b>PEX13</b>          | NM_002618.3                           | <b>TRAPPC11</b>     | NM_021942.5                                            |
| <b>CRYBA1</b>       | NM_005208.4                                 | <b>GFER</b>         | NM_005262.2                                 | <b>PEX16</b>          | NM_057174.2; NM_004813.2              | <b>TRPM3</b>        | NM_001007471.2; NM_001007471.2; NM_020952.4; NM_024971 |
| <b>CRYBA2</b>       | NM_005209.1                                 | <b>GJA1</b>         | NM_000165.3                                 | <b>PEX2</b>           | NM_001172086.1                        | <b>UNC45B</b>       | NM_173167.3                                            |
| <b>CRYBA4</b>       | NM_001886.2                                 | <b>GJA3</b>         | NM_021954.3                                 | <b>PEX26</b>          | NM_017929.5                           | <b>VIM</b>          | NM_003380.3                                            |
| <b>CRYBB1</b>       | NM_001887.3                                 | <b>GJA8</b>         | NM_005267.4                                 | <b>PEX3</b>           | NM_003630.2                           | <b>VSX2</b>         | NM_182894.2                                            |
| <b>CRYBB2</b>       | NM_000496.2                                 | <b>GNPAT</b>        | NM_014236.3                                 | <b>PEX6</b>           | NM_000287.3                           | <b>WFS1</b>         | NM_006005.3                                            |
| <b>CRYBB3</b>       | NM_004076.3                                 | <b>GTF2H5</b>       | NM_207118.2                                 | <b>PEX7</b>           | NM_000288.3                           | <b>XYLT2</b>        | NM_022167.3                                            |
| <b>CRYGB</b>        | NM_005210.3                                 | <b>HMX1</b>         | NM_018942.2                                 | <b>PITX2</b>          | NM_000325.5; NM_153426.1              |                     |                                                        |
| <b>CRYGC</b>        | NM_020989.3                                 | <b>HSF4</b>         | NM_001040667.2                              | <b>PITX3</b>          | NM_005029.3                           |                     |                                                        |
| <b>CRYGD</b>        | NM_006891.3                                 | <b>JAM3</b>         | NM_032801.3                                 | <b>POMGNT1</b>        | NM_017739.3; NM_001243766.1           |                     |                                                        |
| <b>CRYGS</b>        | NM_017541.2                                 | <b>LAMB2</b>        | NM_002292.3                                 | <b>POMT1</b>          | NM_007171.3                           |                     |                                                        |
| <b>CTDP1</b>        | NM_004715.4                                 | <b>LARGE</b>        | NM_004737.4                                 | <b>POMT2</b>          | NM_013382.5                           |                     |                                                        |



**Supplementary Table 4: Genes and transcripts included in panels that were used to test children with corneal dystrophies or anterior segment dysgenesis, including pediatric glaucoma (samples tested between September 2015 and August 2018)**

| Corneal abnormalities panel (32 genes) |                                              | Anterior segment dysgenesis & glaucoma panel (45 genes) |                                                |                |                                          |
|----------------------------------------|----------------------------------------------|---------------------------------------------------------|------------------------------------------------|----------------|------------------------------------------|
| Gene (HGNC)                            | Transcript                                   | Gene (HGNC)                                             | Transcript                                     | Gene (HGNC)    | Transcript                               |
| <i>ABCA3</i>                           | NM_001089.2                                  | <i>ADAMTS10</i>                                         | NM_030957.2                                    | <i>PEX2</i>    | NM_001172086.1                           |
| <i>ADAMTS18</i>                        | NM_199355.2                                  | <i>ADAMTS17</i>                                         | NM_139057.2                                    | <i>PEX26</i>   | NM_017929.5                              |
| <i>ADAMTSL4</i>                        | NM_019032.4                                  | <i>ATOH7</i>                                            | NM_145178.3                                    | <i>PEX3</i>    | NM_003630.2                              |
| <i>ALDH18A1</i>                        | NM_002860.3                                  | <i>B3GALTL</i>                                          | NM_194318.3                                    | <i>PEX6</i>    | NM_000287.3                              |
| <i>B3GALTL (B3GLCT)</i>                | NM_194318.3                                  | <i>(B3GLCT)</i>                                         |                                                | <i>PEX7</i>    | NM_000288.3                              |
| <i>CHRD1</i>                           | NM_001143981                                 | <i>COL4A1</i>                                           | NM_001845.4                                    | <i>PIK3R1</i>  | NM_181523.2; NM_181504.3;<br>NM_181524.1 |
| <i>CHST6</i>                           | NM_021615.4                                  | <i>CYP1B1</i>                                           | NM_000104.3                                    | <i>PITX2</i>   | NM_000325.5; NM_153426.1                 |
| <i>COL8A2</i>                          | NM_005202.3                                  | <i>DDX58</i>                                            | NM_014314.3                                    | <i>PITX3</i>   | NM_005029.3                              |
| <i>GJA1</i>                            | NM_005202.3                                  | <i>DHCR7</i>                                            | NM_001360.2                                    | <i>POMGNT1</i> | NM_017739.3; NM_001243766.1              |
| <i>GLS1</i>                            | NM_014905.4                                  | <i>DNAJB1</i>                                           | NM_006145.2; NM_001313964.1;<br>NM_001300914.1 | <i>POMT1</i>   | NM_007171.3                              |
| <i>HMX1</i>                            | NM_018942.2                                  | <i>FBN1</i>                                             | NM_000138.4                                    | <i>POMT2</i>   | NM_013382.5                              |
| <i>KERA</i>                            | NM_007035.3                                  | <i>FKRP</i>                                             | NM_001039885.2                                 | <i>PXDN</i>    | NM_012293.1                              |
| <i>KRT12</i>                           | NM_000223.3                                  | <i>FKTN</i>                                             | NM_006731.2                                    | <i>SBF2</i>    | NM_030962.3                              |
| <i>KRT3</i>                            | NM_057088.2                                  | <i>FOXC1</i>                                            | NM_001453.2                                    | <i>SLC38A8</i> | NM_001080442.2                           |
| <i>LAMB2</i>                           | NM_002292.3                                  | <i>FOXD3</i>                                            | NM_012183.2                                    |                |                                          |
| <i>MED25</i>                           | NM_030973.3                                  | <i>FOXE3</i>                                            | NM_012186.2                                    |                |                                          |
| <i>MIR184</i>                          | NR_029705.1                                  | <i>GJA1</i>                                             | NM_000165.3                                    |                |                                          |
| <i>OVOL2 promoter</i>                  | NM_021220.3                                  | <i>GPR180</i>                                           | NM_180989.5                                    |                |                                          |
| <i>PIK3R1</i>                          | NM_181523.2; NM_181504.3;<br>NM_181524.1     | <i>HMX1</i>                                             | NM_018942.2                                    |                |                                          |
| <i>PIP5K3 (PIKFYVE)</i>                | NM_015040.3; NM_001178000.1                  | <i>JAG1</i>                                             | NM_000214.2                                    |                |                                          |
| <i>PRDM5</i>                           | NM_018699.3                                  | <i>LAMB2</i>                                            | NM_002292.3                                    |                |                                          |
| <i>PXDN</i>                            | NM_012293.1                                  | <i>LMX1B</i>                                            | NM_001174146.1                                 |                |                                          |
| <i>RAB18</i>                           | NM_021252.3                                  | <i>LTBP2</i>                                            | NM_000428.2                                    |                |                                          |
| <i>RAB3GAP1</i>                        | NM_001172435.1                               | <i>MAF</i>                                              | NM_005360.4                                    |                |                                          |
| <i>RAB3GAP2</i>                        | NM_012414.3                                  | <i>MIR184</i>                                           | NR_029705.1                                    |                |                                          |
| <i>SLC16A12</i>                        | NM_213606.3                                  | <i>MYOC (TIGR)</i>                                      | NM_000261.1                                    |                |                                          |
| <i>SLC4A11</i>                         | NM_032034; NM_001174089.1;<br>NM_001174090.1 | <i>OPTN</i>                                             | NM_001008211.1                                 |                |                                          |
| <i>TACSTD2</i>                         | NM_002353.2                                  | <i>PAX6</i>                                             | NM_001604.4                                    |                |                                          |
| <i>TGFBI</i>                           | NM_000358.2                                  | <i>PEX1</i>                                             | NM_000466.2                                    |                |                                          |
| <i>UBIAD1</i>                          | NM_013319.2                                  | <i>PEX12</i>                                            | NM_000286.2                                    |                |                                          |
| <i>ZEB1</i>                            | NM_030751.5; NM_001174094.1                  | <i>PEX13</i>                                            | NM_002618.3                                    |                |                                          |
| <i>ZNF469</i>                          | NM_001127464.2                               | <i>PEX16</i>                                            | NM_057174.2; NM_004813.2                       |                |                                          |
|                                        |                                              | <i>PEX2</i>                                             | NM_001172086.1                                 |                |                                          |

**Supplementary Table 5: Genes and transcripts included in panels that were used to test children with suspected albinism (samples tested between January 2016 and August 2018)**

| Optic nerve disorders panel (40 genes; including foveal hypoplasia & ocular/oculocutaneous albinism panels) |                                           | Foveal hypoplasia & nystagmus panel (26 genes; including ocular/oculocutaneous albinism panel) |                                           | Ocular/oculocutaneous albinism panel (18 genes) |                                           |
|-------------------------------------------------------------------------------------------------------------|-------------------------------------------|------------------------------------------------------------------------------------------------|-------------------------------------------|-------------------------------------------------|-------------------------------------------|
| Gene (HGNC)                                                                                                 | Transcript                                | Gene (HGNC)                                                                                    | Transcript                                | Gene (HGNC)                                     | Transcript                                |
| <i>ACO2</i>                                                                                                 | NM_001098.2                               | <i>ACO2</i>                                                                                    | NM_001098.2                               | <i>AP3B1</i>                                    | NM_003664.4                               |
| <i>AP3B1</i>                                                                                                | NM_003664.4                               | <i>AP3B1</i>                                                                                   | NM_003664.4                               | <i>BLOC1S3</i>                                  | NM_212550.4                               |
| <i>ATOH7</i>                                                                                                | NM_145178.3                               | <i>ATOH7</i>                                                                                   | NM_145178.3                               | <i>C10orf11</i>                                 | NM_032024.3; NM_001305581.1               |
| <i>BLOC1S3</i>                                                                                              | NM_212550.4                               | <i>BLOC1S3</i>                                                                                 | NM_212550.4                               | <i>CACNA1F</i>                                  | NM_005183.3; NM_001256790.2               |
| <i>C10orf11</i>                                                                                             | NM_032024.3; NM_001305581.1               | <i>C10orf11</i>                                                                                | NM_032024.3; NM_001305581.1               | <i>DTNBP1</i>                                   | NM_032122.4; NM_183040.2                  |
| <i>C12orf65</i>                                                                                             | NM_152269.4                               | <i>CACNA1F</i>                                                                                 | NM_005183.3; NM_001256790.2               | <i>GPR143</i>                                   | NM_000273.2                               |
| <i>CACNA1F</i>                                                                                              | NM_005183.3; NM_001256790.2               | <i>DTNBP1</i>                                                                                  | NM_032122.4; NM_183040.2                  | <i>HPS3</i>                                     | NM_032383.4                               |
| <i>CISD2</i>                                                                                                | NM_001008388.4                            | <i>FRMD7</i>                                                                                   | NM_194277.2                               | <i>HPS4</i>                                     | NM_022081.5; NM_152841.2                  |
| <i>DHCR7</i>                                                                                                | NM_001360.2                               | <i>GPR143</i>                                                                                  | NM_000273.2                               | <i>HPS5</i>                                     | NM_181507.1                               |
| <i>DTNBP1</i>                                                                                               | NM_032122.4; NM_183040.2                  | <i>HMX1</i>                                                                                    | NM_018942.2                               | <i>HPS6</i>                                     | NM_024747.5                               |
| <i>FRMD7</i>                                                                                                | NM_194277.2                               | <i>HPS3</i>                                                                                    | NM_032383.4                               | <i>LYST</i>                                     | NM_000081.3                               |
| <i>GJA1</i>                                                                                                 | NM_000165.3                               | <i>HPS4</i>                                                                                    | NM_022081.5; NM_152841.2                  | <i>OCA2</i>                                     | NM_000275.2                               |
| <i>GPR143</i>                                                                                               | NM_000273.2                               | <i>HPS5</i>                                                                                    | NM_181507.1                               | <i>PLDN (BLOC1S6)</i>                           | NM_001311255.1; NM_012388.3               |
| <i>HMX1</i>                                                                                                 | NM_018942.2                               | <i>HPS6</i>                                                                                    | NM_024747.5                               | <i>SLC24A5</i>                                  | NM_205850.2                               |
| <i>HPS3</i>                                                                                                 | NM_032383.4                               | <i>LYST</i>                                                                                    | NM_000081.3                               | <i>SLC45A2</i>                                  | NM_016180.4; NM_001012509.3               |
| <i>HPS4</i>                                                                                                 | NM_022081.5; NM_152841.2                  | <i>OCA2</i>                                                                                    | NM_000275.2                               | <i>SLC4A11</i>                                  | NM_032034; NM_001174089.1; NM_001174090.1 |
| <i>HPS5</i>                                                                                                 | NM_181507.1                               | <i>PAX6</i>                                                                                    | NM_001604.4                               | <i>TYR</i>                                      | NM_000372.4                               |
| <i>HPS6</i>                                                                                                 | NM_024747.5                               | <i>PLDN (BLOC1S6)</i>                                                                          | NM_001311255.1; NM_012388.3               | <i>TYRP1</i>                                    | NM_000550.2                               |
| <i>LARGE</i>                                                                                                | NM_004737.4                               | <i>RTN4IP1</i>                                                                                 | NM_032730.4                               |                                                 |                                           |
| <i>LYST</i>                                                                                                 | NM_000081.3                               | <i>SIX6</i>                                                                                    | NM_007374.2                               |                                                 |                                           |
| <i>OCA2</i>                                                                                                 | NM_000275.2                               | <i>SLC24A5</i>                                                                                 | NM_205850.2                               |                                                 |                                           |
| <i>OPA1</i>                                                                                                 | NM_015560.2; NM_130837.2                  | <i>SLC38A8</i>                                                                                 | NM_001080442.1                            |                                                 |                                           |
| <i>OPA3</i>                                                                                                 | NM_025136.3; NM_001017989.2               | <i>SLC45A2</i>                                                                                 | NM_016180.4; NM_001012509.3               |                                                 |                                           |
| <i>PAX6</i>                                                                                                 | NM_001604.4                               | <i>SLC4A11</i>                                                                                 | NM_032034; NM_001174089.1; NM_001174090.1 |                                                 |                                           |
| <i>PLDN (BLOC1S6)</i>                                                                                       | NM_001311255.1; NM_012388.3               |                                                                                                |                                           |                                                 |                                           |
| <i>RAB18</i>                                                                                                | NM_021252.3                               | <i>TYR</i>                                                                                     | NM_000372.4                               |                                                 |                                           |
| <i>RAB3GAP1</i>                                                                                             | NM_001172435.1                            | <i>TYRP1</i>                                                                                   | NM_000550.2                               |                                                 |                                           |
| <i>RAB3GAP2</i>                                                                                             | NM_012414.3                               |                                                                                                |                                           |                                                 |                                           |
| <i>RTN4IP1</i>                                                                                              | NM_032730.4                               |                                                                                                |                                           |                                                 |                                           |
| <i>SIX6</i>                                                                                                 | NM_007374.2                               |                                                                                                |                                           |                                                 |                                           |
| <i>SLC24A5</i>                                                                                              | NM_205850.2                               |                                                                                                |                                           |                                                 |                                           |
| <i>SLC38A8</i>                                                                                              | NM_001080442.1                            |                                                                                                |                                           |                                                 |                                           |
| <i>SLC45A2</i>                                                                                              | NM_016180.4; NM_001012509.3               |                                                                                                |                                           |                                                 |                                           |
| <i>SLC4A11</i>                                                                                              | NM_032034; NM_001174089.1; NM_001174090.1 |                                                                                                |                                           |                                                 |                                           |
| <i>SOX2</i>                                                                                                 | NM_003106.3                               |                                                                                                |                                           |                                                 |                                           |
| <i>TBC1D20</i>                                                                                              | NM_144628.3                               |                                                                                                |                                           |                                                 |                                           |
| <i>TMEM126A</i>                                                                                             | NM_032273.3                               |                                                                                                |                                           |                                                 |                                           |
| <i>TYR</i>                                                                                                  | NM_000372.4                               |                                                                                                |                                           |                                                 |                                           |
| <i>TYRP1</i>                                                                                                | NM_000550.2                               |                                                                                                |                                           |                                                 |                                           |
| <i>WFS1</i>                                                                                                 | NM_006005.3                               |                                                                                                |                                           |                                                 |                                           |

We were unable to gain acceptable coverage of HPS1 to include it on these clinical diagnostic panels. HPS10 was also not included.

**Supplementary Table 6:** Genes and transcripts included in panels that were used to test children with inherited retinal disorders (105 gene panel; samples tested between September 2011 and June 2014)

| Gene (HGNC)      | Transcript     | Gene (HGNC)    | Transcript     | Gene (HGNC)    | Transcript     | Gene (HGNC)     | Transcript     |
|------------------|----------------|----------------|----------------|----------------|----------------|-----------------|----------------|
| <i>ABCA4</i>     | NM_000350.2    | <i>CRB1</i>    | NM_201253.2    | <i>NR2E3</i>   | NM_014249.2    | <i>RIMS1</i>    | NM_001168410.1 |
| <i>ADAM9</i>     | NM_003816.2    | <i>CRX</i>     | NM_000554.4    | <i>NRL</i>     | NM_006177.3    | <i>RLBP1</i>    | NM_000326.4    |
| <i>AIPL1</i>     | NM_014336.3    | <i>DFNB31</i>  | NM_015404.3    | <i>OTX2</i>    | NM_021728.2    | <i>ROM1</i>     | NM_000327.3    |
| <i>ARL6</i>      | NM_032146.3    | <i>DHDDS</i>   | NM_024887.2    | <i>PCDH15</i>  | NM_001142763.1 | <i>RP1</i>      | NM_006269.1    |
| <i>BBS1</i>      | NM_024649.4    | <i>EFEMP1</i>  | NM_001039348.2 | <i>PCDH15</i>  | NM_001142769.1 | <i>RP1L1**</i>  | NM_178857.5    |
| <i>BBS10</i>     | NM_024685.3    | <i>ELOVL4</i>  | NM_022726.3    | <i>PCDH15</i>  | NM_001142770.1 | <i>RP2</i>      | NM_006915.2    |
| <i>BBS12</i>     | NM_001178007.1 | <i>EYS</i>     | NM_001142800.1 | <i>PCDH15</i>  | NM_001142771.1 | <i>RP9</i>      | NM_203288.1    |
| <i>BBS2</i>      | NM_031885.3    | <i>FAM161A</i> | NM_001201543.1 | <i>PDE6A</i>   | NM_000440.2    | <i>RPE65</i>    | NM_000329.2    |
| <i>BBS4</i>      | NM_033028.3    | <i>FSCN2</i>   | NM_001077182.2 | <i>PDE6B</i>   | NM_000283.3    | <i>RPGR*</i>    | NM_001034853.1 |
| <i>BBS5</i>      | NM_152384.2    | <i>FZD4</i>    | NM_012193.3    | <i>PDE6C</i>   | NM_006204.3    | <i>RPGRIP1</i>  | NM_020366.3    |
| <i>BBS7</i>      | NM_176824.2    | <i>GNAT2</i>   | NM_005272.3    | <i>PDE6G</i>   | NM_002602.3    | <i>RS1</i>      | NM_000330.3    |
| <i>BBS7</i>      | NM_018190.3    | <i>GPR98</i>   | NM_032119.3    | <i>PITPNM3</i> | NM_031220.3    | <i>SAG</i>      | NM_000541.4    |
| <i>BBS9</i>      | NM_198428.2    | <i>GUCA1A</i>  | NM_000409.3    | <i>PRCD</i>    | NM_001077620.2 | <i>SEMA4A</i>   | NM_022367.3    |
| <i>BEST1</i>     | NM_004183.3    | <i>GUCA1B</i>  | NM_002098.5    | <i>PROM1</i>   | NM_006017.2    | <i>SNRNP200</i> | NM_014014.4    |
| <i>C1QTNF5</i>   | NM_015645.3    | <i>GUCY2D</i>  | NM_000180.3    | <i>PRPF3</i>   | NM_004698.2    | <i>SPATA7</i>   | NM_018418.4    |
| <i>C2orf71</i>   | NM_001029883.1 | <i>IDH3B</i>   | NM_006899.2    | <i>PRPF31</i>  | NM_015629.3    | <i>TEAD1</i>    | NM_021961.5    |
| <i>CA4</i>       | NM_000717.3    | <i>IDH3B</i>   | NM_174855.1    | <i>PRPF6</i>   | NM_012469.3    | <i>TIMP3</i>    | NM_000362.4    |
| <i>CACNA2D4</i>  | NM_172364.4    | <i>IMPDH1</i>  | NM_000883.3    | <i>PRPF8</i>   | NM_006445.3    | <i>TOPORS</i>   | NM_005802.4    |
| <i>CDH23</i>     | NM_022124.5    | <i>IMPG2</i>   | NM_016247.3    | <i>PRPH2</i>   | NM_000322.4    | <i>TRIM32</i>   | NM_012210.3    |
| <i>CDHR1</i>     | NM_001171971.1 | <i>KCNV2</i>   | NM_133497.3    | <i>RAX2</i>    | NM_032753.3    | <i>TTC8</i>     | NM_144596.2    |
| <i>CDHR1</i>     | NM_033100.2    | <i>KLHL7</i>   | NM_001031710.2 | <i>RBP3</i>    | NM_002900.2    | <i>TULP1</i>    | NM_003322.3    |
| <i>CEP290***</i> | NM_025114.3    | <i>LCA5</i>    | NM_181714.3    | <i>RD3</i>     | NM_183059.2    | <i>UNC119</i>   | NM_005148.3    |
| <i>CERKL</i>     | NM_001030311.2 | <i>LRAT</i>    | NM_004744.3    | <i>RDH12</i>   | NM_152443.2    | <i>UNC119</i>   | NM_054035.2    |
| <i>CHM</i>       | NM_000390.2    | <i>LRP5</i>    | NM_002335.2    | <i>RDH5</i>    | NM_001199771.1 | <i>USH1C</i>    | NM_005709.3    |
| <i>CLRN1</i>     | NM_052995.2    | <i>MERTK</i>   | NM_006343.2    | <i>RGR</i>     | NM_002921.3    | <i>USH1C</i>    | NM_153676.3    |
| <i>CLRN1</i>     | NM_001195794.1 | <i>MKKS</i>    | NM_018848.2    | <i>RGS9</i>    | NM_003835.3    | <i>USH1G</i>    | NM_173477.2    |
| <i>CNGA1</i>     | NM_001142564.1 | <i>MKS1</i>    | NM_017777.3    | <i>RGS9</i>    | NM_001165933.1 | <i>USH2A</i>    | NM_206933.2    |
| <i>CNGA3</i>     | NM_001298.2    | <i>MKS1</i>    | NM_001165927.1 | <i>RHO</i>     | NM_000539.3    | <i>ZNF513</i>   | NM_144631.5    |
| <i>CNGB1</i>     | NM_001297.4    | <i>MYO7A</i>   | NM_000260.3    | <i>RIMS1</i>   | NM_014989.4    |                 |                |
| <i>CNGB3</i>     | NM_019098.4    | <i>NDP</i>     | NM_000266.3    | <i>RIMS1</i>   | NM_001168407.1 |                 |                |

\* For RPGR it was not possible to obtain high quality read for exon ORF15;

\*\* Analysis of the coding region between c.4000 and c.7000 of the RP1L1 gene was not included;

\*\*\*Testing of the common intron 26 mutation c.2991+1655A>G in CEP290 was included in this analysis.

**Supplementary Table 7: Genes and transcripts included in panels that were used to test children with inherited retinal disorders (177 gene panel; samples tested between July 2014 and August 2018)**

| Gene (HGNC)     | Transcript   | Gene (HGNC)     | Transcript   | Gene (HGNC)         | Transcript   | Gene (HGNC)     | Transcript   |
|-----------------|--------------|-----------------|--------------|---------------------|--------------|-----------------|--------------|
| <i>ABCA4*</i>   | NM_000350    | <i>CRX</i>      | NM_000554    | <i>MFRP</i>         | NM_031433    | <i>RGR</i>      | NM_002921    |
| <i>ABHD12</i>   | NM_001042472 | <i>CSPP1</i>    | NM_024790    | <i>MKKS</i>         | NM_018848    | <i>RGS9</i>     | NM_003835    |
| <i>ACBD5</i>    | NM_145698    | <i>CYP4V2</i>   | NM_207352    | <i>MKS1</i>         | NM_017777    | <i>RGS9</i>     | NM_001165933 |
| <i>ADAM9</i>    | NM_003816    | <i>DFNB31</i>   | NM_015404    | <i>MKS1</i>         | NM_001165927 | <i>RHO</i>      | NM_000539    |
| <i>ADAMTS18</i> | NM_199355    | <i>DHDDS</i>    | NM_024887    | <i>MVK</i>          | NM_000431    | <i>RIMS1</i>    | NM_014989    |
| <i>AHI1</i>     | NM_001134832 | <i>DTHD1</i>    | NM_001136536 | <i>MYO7A</i>        | NM_000260    | <i>RIMS1</i>    | NM_001168407 |
| <i>AHI1</i>     | NM_017651    | <i>DTHD1</i>    | NM_001170700 | <i>NDP</i>          | NM_000266    | <i>RIMS1</i>    | NM_001168410 |
| <i>AIPL1</i>    | NM_014336    | <i>EFEMP1</i>   | NM_001039348 | <i>NEK2</i>         | NM_002497    | <i>RLBP1</i>    | NM_000326    |
| <i>ARL2BP</i>   | NM_012106    | <i>ELOVL4</i>   | NM_022726    | <i>NMNAT1</i>       | NM_0022787   | <i>ROM1</i>     | NM_000327    |
| <i>ARL6</i>     | NM_032146    | <i>EMC1</i>     | NM_015047    | <i>NPHP1</i>        | NM_000272    | <i>RP1</i>      | NM_006269    |
| <i>BBIP1</i>    | NM_001195306 | <i>EYS</i>      | NM_001142800 | <i>NPHP3</i>        | NM_153240    | <i>RP1L1**</i>  | NM_178857    |
| <i>BBS1</i>     | NM_024649    | <i>FAM161A</i>  | NM_001201543 | <i>NPHP3</i>        | NM_015102    | <i>RP2</i>      | NM_006915    |
| <i>BBS10</i>    | NM_024685    | <i>FLVCR1</i>   | NM_014053    | <i>NR2E3</i>        | NM_014249    | <i>RP9</i>      | NM_203288    |
| <i>BBS12</i>    | NM_001178007 | <i>FSCN2</i>    | NM_001077182 | <i>NRL</i>          | NM_006177    | <i>RPE65</i>    | NM_000329    |
| <i>BBS2</i>     | NM_031885    | <i>FZD4</i>     | NM_012193    | <i>NYX</i>          | NM_022567    | <i>RPGR***</i>  | NM_001034853 |
| <i>BBS4</i>     | NM_033028    | <i>GNAT1</i>    | NM_000172    | <i>OAT</i>          | NM_000274    | <i>RPGRIP1</i>  | NM_020366    |
| <i>BBS5</i>     | NM_152384    | <i>GNAT2</i>    | NM_005272    | <i>OFD1*</i>        | NM_003611    | <i>RPGRIP1L</i> | NM_015272    |
| <i>BBS7</i>     | NM_176824    | <i>GNPTG</i>    | NM_032520    | <i>OTX2</i>         | NM_021728    | <i>RS1</i>      | NM_000330    |
| <i>BBS9</i>     | NM_198428    | <i>GPR125</i>   | NM_145290    | <i>PANK2</i>        | NM_153638    | <i>SAG</i>      | NM_000541    |
| <i>BEST1</i>    | NM_004183    | <i>GPR179</i>   | NM_001004334 | <i>PCDH15</i>       | NM_001142763 | <i>SDCCAG8</i>  | NM_006642    |
| <i>C1QTNF5</i>  | NM_015645    | <i>GPR98</i>    | NM_032119    | <i>PCDH15</i>       | NM_001142769 | <i>SEMA4A</i>   | NM_022367    |
| <i>C2orf71</i>  | NM_001029883 | <i>GRK1</i>     | NM_002929    | <i>PCDH15</i>       | NM_001142770 | <i>SLC24A1</i>  | NM_004727    |
| <i>C2ORF86</i>  | NM_015910    | <i>GRM6</i>     | NM_000843    | <i>PCDH15</i>       | NM_001142771 | <i>SLC24A1</i>  | NM_001254740 |
| <i>C8ORF37</i>  | NM_177965    | <i>GUCA1A</i>   | NM_000409    | <i>PCYT1A</i>       | NM_005017    | <i>SNRNP200</i> | NM_014014    |
| <i>C21orf2</i>  | NM_004928    | <i>GUCA1B</i>   | NM_002098    | <i>PDE6A</i>        | NM_000440    | <i>SPATA7</i>   | NM_018418    |
| <i>CA4</i>      | NM_000717    | <i>GUCY2D</i>   | NM_000180    | <i>PDE6B</i>        | NM_000283    | <i>TEAD1</i>    | NM_021961    |
| <i>CABP4</i>    | NM_145200    | <i>HARS</i>     | NM_002109    | <i>PDE6C</i>        | NM_006204    | <i>TIMP3</i>    | NM_000362    |
| <i>CACNA1F</i>  | NM_005183    | <i>HMX1</i>     | NM_018942    | <i>PDE6G</i>        | NM_002602    | <i>TMEM237</i>  | NM_001044385 |
| <i>CACNA2D4</i> | NM_172364    | <i>IDH3B</i>    | NM_006899    | <i>PEX1</i>         | NM_000466    | <i>TOPORS</i>   | NM_005802    |
| <i>CAPN5</i>    | NM_004055    | <i>IDH3B</i>    | NM_174855    | <i>PEX2 (PXMP3)</i> | NM_000318    | <i>TRIM32</i>   | NM_012210    |
| <i>CC2D2A</i>   | NM_001080522 | <i>IFT140</i>   | NM_014714    | <i>PEX7</i>         | NM_000288    | <i>TRPM1</i>    | NM_002420    |
| <i>CDH3</i>     | NM_001793    | <i>IMPDH1</i>   | NM_000883    | <i>PHYH</i>         | NM_006214    | <i>TSPAN12</i>  | NM_012338    |
| <i>CDH23</i>    | NM_022124    | <i>IMPG1</i>    | NM_001563    | <i>PITPNM3</i>      | NM_031220    | <i>TTC8</i>     | NM_144596    |
| <i>CDHR1</i>    | NM_001171971 | <i>IMPG2</i>    | NM_016247    | <i>PLA2G5</i>       | NM_000929    | <i>TUB</i>      | NM_177972    |
| <i>CDHR1</i>    | NM_033100    | <i>INPP5E</i>   | NM_019892    | <i>PRCD</i>         | NM_001077620 | <i>TULP1</i>    | NM_003322    |
| <i>CEP164</i>   | NM_014956    | <i>INVS</i>     | NM_014425    | <i>PROM1</i>        | NM_006017    | <i>UNC119</i>   | NM_005148    |
| <i>CEP290*</i>  | NM_025114    | <i>IQCB1</i>    | NM_001023570 | <i>PRPF3</i>        | NM_004698    | <i>UNC119</i>   | NM_054035    |
| <i>CERKL</i>    | NM_001030311 | <i>ITM2B</i>    | NM_021999    | <i>PRPF31</i>       | NM_015629    | <i>USH1C</i>    | NM_005709    |
| <i>CHM</i>      | NM_000390    | <i>KCNJ13</i>   | NM_002242    | <i>PRPF4</i>        | NM_004697    | <i>USH1C</i>    | NM_153676    |
| <i>CIB2</i>     | NM_006383    | <i>KCNV2</i>    | NM_133497    | <i>PRPF6</i>        | NM_012469    | <i>USH1G</i>    | NM_173477    |
| <i>CLN3</i>     | NM_000086    | <i>KIAA1549</i> | NM_001164665 | <i>PRPF8</i>        | NM_006445    | <i>USH2A*</i>   | NM_206933    |
| <i>CLRN1</i>    | NM_052995    | <i>KIAA1549</i> | NM_020910    | <i>PRPH2</i>        | NM_000322    | <i>VCAN</i>     | NM_004385    |
| <i>CLRN1</i>    | NM_001195794 | <i>KIF11</i>    | NM_004523    | <i>RAB28</i>        | NM_001017979 | <i>VPS13B</i>   | NM_017890    |
| <i>CNGA1</i>    | NM_001142564 | <i>KLHL7</i>    | NM_001031710 | <i>RAX2</i>         | NM_032753    | <i>WDR19</i>    | NM_025132    |
| <i>CNGA3</i>    | NM_001298    | <i>LCA5</i>     | NM_181714    | <i>RBP3</i>         | NM_002900    | <i>ZNF423</i>   | NM_015069    |
| <i>CNGB1</i>    | NM_001297    | <i>LRAT</i>     | NM_004744    | <i>RBP4</i>         | NM_006744    | <i>ZNF513</i>   | NM_144631    |
| <i>CNGB3</i>    | NM_019098    | <i>LRP5</i>     | NM_002335    | <i>RD3</i>          | NM_183059    |                 |              |
| <i>CNNM4</i>    | NM_020184    | <i>LZTFL1</i>   | NM_020347    | <i>RDH12</i>        | NM_152443    |                 |              |
| <i>CRB1</i>     | NM_201253    | <i>MERTK</i>    | NM_006343    | <i>RDH5</i>         | NM_001199771 |                 |              |

\*Testing for the following intronic mutations was included in this analysis: *CEP290* c.2991+1655A>G; *USH2A* c.7595-2144A>G; *OFD1* c.935+706A>G; *ABCA4* c.5196+1056A>G, c.5196+1137G>A, c.5196+1216C>A, c.4539+2001G>A, c.4539+2028C>T, c.5461-10T>C;

\*\*Analysis of the coding region of exon 4 of the *RP1L1* gene was not included; (iv)\*\*\* For *RPGR* it was not possible to obtain high quality read for exon ORF15.

**Supplementary Table 8:** Modes of inheritance observed across 129 children with inherited eye disease and a probable molecular diagnosis.

| <b>Mode of Inheritance</b>                        | <b>Number of occurrences</b> | <b>Percentage of cases (%)</b> |
|---------------------------------------------------|------------------------------|--------------------------------|
| <b>Autosomal dominant</b>                         | 35                           | 27 %                           |
| no relevant family history reported in            | 24                           | 18 %                           |
| <b>Autosomal recessive</b>                        | 79                           | 61 %                           |
| cases with a homozygous change                    | 38                           | 29 %                           |
| cases with presumed compound heterozygous changes | 41                           | 32 %                           |
| <b>X-linked</b>                                   | 15                           | 12 %                           |
| no relevant family history reported in            | 9                            | 7 %                            |
